# Supplementary material
Source: PubMed Central journal article supplement (PMC6004444)
Supplement: pnas.1800077115.sapp.pdf [file pnas.1800077115.sapp.pdf]

## SUPPLEMENTAL INFORMATION

# Dynamic action potential clamp predicts functional separation in mild familial and severe *de novo* forms of *SCN2A* epilepsy

## PATIENTS

The study was approved by the Human Research Ethics Committee of Austin Health, Melbourne. Nineteen individuals with the R1882Q or R853Q *SCN2A* mutations were identified from the literature, and from an *SCN2A* support group ([www.scn2a.org](http://www.scn2a.org)).

Clinical data was collated from the literature for previously reported individuals (N = 14), with updated clinical information obtained in one patient. Individuals whose clinical data was not previously published (N = 5), had their mutations identified through clinical testing. Detailed phone or clinical interviews with these parents were undertaken by paediatric epileptologists (KBH, MRC), home videos were reviewed and medical records from the treating neurologist obtained. Mutations were confirmed *de novo* in 15 patients, inheritance was unknown in four. The age at last review was known in 13 patients with a median age of 6.5 years (range 5 months – 25 years). One patient was deceased.

Individuals with **R1882Q** mutations had early-onset developmental and epileptic encephalopathies (DEE) with focal seizures beginning on the first day of life; some showed marked improvement with phenytoin, and some had benefit with other sodium channel blockers. However, despite improved seizure control with phenytoin, there was no difference in developmental impairment in responders compared with non-responders, suggesting that seizure control is not sufficient to reverse the developmental impairment associated with the *SCN2A* mutation. All but one had severe to profound developmental delay, consistent with the ‘severe neonatal-infantile’ phenotype previously reported, whereas the milder phenotype in one infant was that of the ‘intermediate neonatal-infantile’ group (1).

Seizure onset occurred on day one of life in all patients with an R1882Q mutation (Table S1). Focal seizures were the initial seizure type in five; initial seizure type was unknown in two. The epileptic syndrome at onset was early infantile epileptic encephalopathy (EIEE) in three, unclassified in three and unknown in one. Seizure types evolved in six patients, including to infantile spasms in two. Seizures were ongoing at last review in the five patients for whom this information was available. Phenytoin use was reported in five patients, with improved seizure control in two and no definite effect on seizures in three. It should be noted though, that information on the doses used and blood levels reached was not available to determine whether a ‘therapeutic dose’ had been reached. One patient with no improved seizures had ‘continuous thrashing’ with phenytoin loads, being presumably an exacerbation of the movement disorder. Seizures were improved with carbamazepine in one. Two patients did not report improvement with any sodium channel blocker. At last review, six patients had severe developmental delay, and one moderate. A movement disorder was present in three patients (opisthotonus and dystonia (1), opisthotonus and oculogyric crises (1), ‘thrashing movements’ (1)), absent in one, and unknown in three. Other common features included hypotonia (4, one of whom also had episodic appendicular hypertonia), acquired microcephaly (3) and constipation (2). Two patients had normal brain imaging, one a subtle cortical dysplasia and one had T2 hyperintensities in the white matter, T1 hyperintensity in the basal ganglia and elongated superior temporal sulci.

Individuals with the **R853Q** mutation had later-onset DEE, with median onset of seizures at the age of 8 months, usually preceded by some degree of developmental delay. The seizure type at onset was epileptic spasms in most. In these individuals, the response to sodium channel blockers was mixed. Seizures did not improve with phenytoin; indeed, worsening was reported in one. Improved seizure control was, however, reported with other sodium channel blockers in three patients (lamotrigine, carbamazepine, both rendering a patient seizure-free; and oxcarbazepine). Movement disorders, such as dystonia, were seen in both groups; however, severe choreoathetosis only occurred with the R853Q mutation. In two of these patients, the choreoathetosis preceded seizure onset. In both groups, most patients had other types of seizures arising over time, refractory seizures and significant developmental delay.

Four previously published patients with R853Q mutation had minimal available clinical information. Two were listed as having an epileptic encephalopathy, one West syndrome (WS) and one Lennox Gastaut syndrome (LGS). More detailed clinical data was available on eight patients (Table S2). For these individuals, seizure onset occurred at a median age of eight months (range 6 months – 3 years). The initial seizure type was infantile spasms in six, infantile spasms and tonic seizures in one, and tonic seizures in one. The epileptic syndrome at seizure onset was WS in seven and unclassified in one. Evolution to other seizure types was reported in seven patients, each having multiple seizure types. After evolution of seizures, the epilepsy syndrome was unclassified or unknown in all but one patient, who had LGS. Phenytoin use was reported in three patients, with no effect in two and exacerbation of seizures in one. Six patients had used other sodium channel blockers. Seizure exacerbation was noted in only one patient (on carbamazepine). One was seizure free on lamotrigine and seizure control improved on carbamazepine in one. One patient had improvement of seizures on low dose oxcarbazepine; at higher dose, seizure control remained good but there was marked worsening of overall motor function and of stimulatory behaviours. ACTH was beneficial in four patients; vigabatrin was beneficial in one and exacerbated seizures in three. Seven individuals had ongoing seizures at last review, although reduction in seizure frequency from age four years was noted in three. Development was delayed prior to seizure onset in six patients, normal in one and unknown in one. At last review, all patients had severe developmental delay. All individuals had a movement disorder; four had choreoathetosis two dystonia and two a mixed movement disorder. For three patients in whom further information on the movement disorder was available, the movement disorder had onset in infancy, predating seizure onset in two, and remaining a major medical issue in all three. Improvement was noted with L-Dopa/Carbidopa and cannabis (high CBD, low THC preparation) in one and triheptanoin in another. Additional features included hypotonia (5), severe vomiting and failure to thrive in infancy (3), microcephaly (2), extreme irritability (2) and episodic agitation with red, hot areas of the body (2). Brain imaging was normal in three, showed atrophy in three, thin or hypoplastic corpus callosum in two, areas of hyperintensity on T2-weighted imaging in two and white matter volume loss in one.

**Table S1. Clinical features and treatment response in the newly identified and previously published patients with R1882Q mutation (N = 7)**

| Reference and patient (p) | Mutation inheritance | Age at last review   | Age epilepsy onset (+/- severity) | Onset seizure type  | Onset epileptic syndrome | Later seizure type     | Later epileptic syndrome | PHT response                                                                         | Other sodium channel blocker response            | Other AED response             | Ongoing seizures at last review? | Movement disorder/ paroxysmal neurological symptoms | Development pre-seizure onset | Development at last review (+/- autism) | MRI                                                                                                      | Other                                                                                                                   |
|---------------------------|----------------------|----------------------|-----------------------------------|---------------------|--------------------------|------------------------|--------------------------|--------------------------------------------------------------------------------------|--------------------------------------------------|--------------------------------|----------------------------------|-----------------------------------------------------|-------------------------------|-----------------------------------------|----------------------------------------------------------------------------------------------------------|-------------------------------------------------------------------------------------------------------------------------|
| (1, 4)<br>This study (p1) | <i>de novo</i>       | 21 months (deceased) | 1 day                             | F                   | EIEE                     | T                      | Unclassified             | Benefit                                                                              | None beneficial                                  | None beneficial                | Yes                              | Opisthotonus, oculogyric crises                     | N/A (too young)               | Delayed (severe)                        | T2 hyperintensity in white matter, T1 hyperintensity in basal ganglia, elongated superior temporal sulci | Axial hypotonia, intermittent appendicular hypertonia, acquired microcephaly, extreme irritability, severe constipation |
| (1)<br>This study (p2)    | <i>de novo</i>       | 3 years              | 1 day                             | F                   | Unclassified             | F                      | Unclassified             | Benefit                                                                              | None beneficial                                  | Benefit with triheptanoin, CBD | Yes                              | Nil                                                 | N/A (too young)               | Delayed (moderate)                      | Normal                                                                                                   | Hypotonia, sensory issues                                                                                               |
| This study (p3)           | <i>de novo</i>       | 5 years              | 1 day                             | F                   | Unclassified             | F, autonomic, gelastic | Unclassified             | No definite benefit, movement disorder ('continuous thrashing') with phenytoin loads | None beneficial                                  | Benefit with VPA               | Yes                              | 'Thrashing' movements                               | N/A (too young)               | Delayed (severe)                        | n.a.                                                                                                     | Hypotonia, constipation, respiratory issues                                                                             |
| This study (p4)           | UK                   | 5 months             | 5 months                          | F                   | Unclassified             | F, T, Sp               | Unclassified             | No definite benefit                                                                  | None beneficial                                  | None beneficial                | Yes                              | Opisthotonus, dystonia                              | N/A (too young)               | Delayed (severe)                        | Normal                                                                                                   | Hypotonia, excess startle, elevated liver transaminases                                                                 |
| (7) (p1)                  | <i>de novo</i>       | n.a.                 | 1 day                             | F                   | EIEE                     | Sp, T, TCS, gelastic   | n.a.                     | n.a.                                                                                 | n.a.                                             | n.a.                           | n.a.                             | n.a.                                                | N/A (too young)               | Delayed (severe)                        | n.a.                                                                                                     | Microcephaly                                                                                                            |
| (7) (p2)                  | <i>de novo</i>       | n.a.                 | 1 day                             | 'neonatal seizures' | EIEE                     | T, apnoeic             | n.a.                     | n.a.                                                                                 | n.a.                                             | n.a.                           | n.a.                             | n.a.                                                | N/A (too young)               | Delayed (severe)                        | n.a.                                                                                                     | n.a.                                                                                                                    |
| (6)                       | UK                   | 10.5 years           | 1 day                             | Not applicable      | n.a.                     | F, C                   | n.a.                     | No effect                                                                            | CBZ - seizure reduction, OXC and LTG - no effect | None beneficial                | Yes                              | n.a.                                                | N/A (too young)               | Delayed (severe)                        | Subtle cortical dysplasia                                                                                | Microcephaly                                                                                                            |

**Abbreviations.** AED, anti-epileptic drug; C, clonic; CBZ, carbamazepine; EIEE, Early infantile epileptic encephalopathy; F, focal; LTG, lamotrigine; MRI, magnetic resonance imaging; n.a., not available; N/A, not assessed; OXC, oxcarbazepine; PHT, phenytoin; Sp, spasms; T, tonic; TCS, tonic clonic seizures; VPA, valproic acid

**Table S2. Clinical features and treatment response in the newly identified and previously published patients with R853Q mutation (N = 12)**

| Reference and patient (p) | Mutation inheritance    | Age at last review | Age epilepsy onset (+/- severity) | Onset seizure type | Onset epileptic syndrome | Later seizure type | Later epileptic syndrome    | PHT response         | Other sodium channel blocker response                                                                                               | Other AED response                                                                                              | Ongoing seizures at last review?                       | Movement disorder/paroxysmal neurological symptoms                                                           | Development pre-seizure onset | Development at last review (+/- autism) | MRI                                                   | Other                                                                                                                                                                                                                                                                        |
|---------------------------|-------------------------|--------------------|-----------------------------------|--------------------|--------------------------|--------------------|-----------------------------|----------------------|-------------------------------------------------------------------------------------------------------------------------------------|-----------------------------------------------------------------------------------------------------------------|--------------------------------------------------------|--------------------------------------------------------------------------------------------------------------|-------------------------------|-----------------------------------------|-------------------------------------------------------|------------------------------------------------------------------------------------------------------------------------------------------------------------------------------------------------------------------------------------------------------------------------------|
| This study (p1)           | <i>de novo</i>          | 6 years            | 6 months                          | Sp                 | WS                       | T, Sp              | Unclassified                | Not used             | CBZ - benefit                                                                                                                       | None beneficial, VGB exacerbated seizures                                                                       | Yes (but rare after 4 years old, EEG remains abnormal) | Choreoathetosis (onset 9 months, benefit with L-Dopa/Carbidopa and cannabis (high CBD, low THC preparation)) | Delayed (mild)                | Delayed (severe)                        | White matter volume loss, thin corpus callosum        | Hypotonia, vomiting and FTT                                                                                                                                                                                                                                                  |
| This study (p2)           | <i>de novo</i>          | 7 years            | 8 months                          | Sp, T              | WS                       | T, Sp, M           | Unclassified                | Exacerbated seizures | OXC - benefit at low dose, at high dose seizures still controlled but marked worsening of motor function and stimulatory behaviours | Benefit with ACTH, THC, triheptanoin. VGB exacerbated seizures.                                                 | Yes (but infrequent after 4 years old, EEG normal)     | Choreoathetosis (onset early infancy, more obvious since seizures have settled, benefit with triheptanoin)   | Delayed (mild)                | Delayed (severe)                        | Normal                                                | Vomiting (ceased transiently with ACTH, then permanently at 3 years old) and FTT, hypotonia, extreme irritability, episodes of agitation with red, hot ears lasting minutes to hours, hypersensitivity to touch, strabismus (resolved), mildly abnormal liver function tests |
| This study (p3)           | UK (parents not tested) | 12 years           | 6 months                          | Sp                 | WS                       | T, F, M            | Unclassified                | No effect            | n.a.                                                                                                                                | Benefit with paraldehyde (for treatment of long clusters of seizures), VGB exacerbated seizures, ACTH no effect | Yes (but less frequent after 4 years old)              | Choreoathetosis (onset early infancy)                                                                        | Delayed                       | Delayed (severe)                        | Normal                                                | Vomiting and FTT, hypotonia, extreme irritability (some improvement with VPA, GBP and amitriptyline), episodic agitation with migrating red, hot areas of body, hypersensitivity to touch and noise                                                                          |
| (6) (p1)                  | <i>de novo</i>          | 6.5 years          | 8 months                          | Sp                 | WS                       | AA, T, F           | LGS                         | Not used             | CBZ - exacerbated seizures                                                                                                          | Benefit with ACTH (seizure free - presumably means spasm free), VPA, CLB, TPM                                   | Yes                                                    | Dystonia                                                                                                     | Normal                        | Delayed (severe)                        | Atrophy, T2 hyperintensities (? Regions)              | Microcephaly, preterm infant                                                                                                                                                                                                                                                 |
| (6) (p2)                  | <i>de novo</i>          | 8 years            | 13 months                         | Sp                 | WS                       | T, autonomic, M    | UK (EEG called 'CSWS-like') | No effect            | OXC, LTG - no effect                                                                                                                | Benefit with VGB, CLB, PB                                                                                       | Yes                                                    | Choreoathetosis                                                                                              | Delayed (moderate)            | Delayed (severe)                        | Normal                                                | Hypotonia                                                                                                                                                                                                                                                                    |
| (6) (p3)                  | UK                      | 25 years           | 3 years                           | T                  | Unclassified             | Sp                 | n.a.                        | n.a.                 | n.a.                                                                                                                                | Benefit with ACTH, VPA                                                                                          | Yes                                                    | Hand dystonia                                                                                                | Delayed (severe)              | Delayed (severe)                        | CC hypoplasia                                         | Pyramidal signs, arachnodactyly                                                                                                                                                                                                                                              |
| (3) (p1)                  | <i>de novo</i>          | n.a.               | n.a.                              | n.a.               | LGS                      | n.a.               | n.a.                        | n.a.                 | n.a.                                                                                                                                | n.a.                                                                                                            | n.a.                                                   | n.a.                                                                                                         | n.a.                          | n.a.                                    | n.a.                                                  | n.a.                                                                                                                                                                                                                                                                         |
| (3) (p2)                  | <i>de novo</i>          | n.a.               | n.a.                              | Sp                 | WS                       | n.a.               | n.a.                        | n.a.                 | n.a.                                                                                                                                | n.a.                                                                                                            | n.a.                                                   | n.a.                                                                                                         | n.a.                          | n.a.                                    | n.a.                                                  | n.a.                                                                                                                                                                                                                                                                         |
| (2, 8)                    | <i>de novo</i>          | UK (> 6 years)     | 10 months                         | Sp                 | WS                       | n.a.               | n.a.                        | n.a.                 | LTG - seizure free                                                                                                                  | n.a.                                                                                                            | No (seizure free from 6 y 2 m, after LTG)              | Dystonia, chorea, ballismus                                                                                  | n.a.                          | Delayed (severe)                        | Cerebral and cerebellar atrophy, thin corpus callosum | n.a.                                                                                                                                                                                                                                                                         |
| (5)                       | <i>de novo</i>          | 2 years            | 8 months                          | Sp                 | WS                       | F, M               | n.a.                        | n.a.                 | LTG - 'remained intractable'                                                                                                        | Benefit with ACTH (ceased spasms)                                                                               | Yes                                                    | Dystonia, chorea                                                                                             | Delayed                       | Delayed (severe)                        | Atrophy, T2 hyperintensities BG and thalamus          | Hypotonia, microcephaly                                                                                                                                                                                                                                                      |
| (9) (p1)                  | <i>de novo</i>          | n.a.               | n.a.                              | n.a.               | n.a.                     | n.a.               | n.a.                        | n.a.                 | n.a.                                                                                                                                | n.a.                                                                                                            | n.a.                                                   | n.a.                                                                                                         | n.a.                          | n.a.                                    | n.a.                                                  | Listed as 'EE' with no further information provided                                                                                                                                                                                                                          |
| (9) (p2)                  | <i>de novo</i>          | n.a.               | n.a.                              | n.a.               | n.a.                     | n.a.               | n.a.                        | n.a.                 | n.a.                                                                                                                                | n.a.                                                                                                            | n.a.                                                   | n.a.                                                                                                         | n.a.                          | n.a.                                    | n.a.                                                  | Listed as 'EE' with no further information provided                                                                                                                                                                                                                          |

**Abbreviations (Tables 1 and 2).** AA, atypical absence; AED, anti-epileptic drug; ACTH, adrenocorticotrophic hormone; CC, corpus callosum; CBD, cannabidiol; CBZ, carbamazepine; CLB, clobazam; CSWS, continuous spike wave in sleep; EEG, electroencephalogram; EE, epileptic encephalopathy; F, focal; FTT, failure to thrive; GBP, gabapentin; LTG, lamotrigine; LGS, Lennox-Gastaut syndrome, M, myoclonic; MRI, magnetic resonance imaging; n.a., not available; OXC, oxcarbazepine; PB, phenobarbital; PHT, phenytoin; Sp, spasms; T, tonic; THC tetrahydrocannabinol; TPM, topiramate; UK, unknown; VGB, vigabatrin; VPA, valproic acid; WS, West syndrome

## PLASMIDS

The SCN2A plasmid encoding the adult isoform of the human Nav1.2 channel (pcDNA3.1(+)-Nav1.2) has been previously described (10). The R853Q mutation is located in the voltage sensor of domain 2. L1563V is in the second segment of domain 4, and R1882Q in the COOH terminus (Fig. 1A). The R853Q mutation was introduced with QuikChange site-directed mutagenesis (Agilent Technologies, Santa Clara, CA) using forward and reverse primers GTTCTCCGATCATTCCAGCTGCTCCGAGTTTTC and GAAAACTCGGAGCAGCTGGAATGATCGGAGAAC, respectively. The pcDNA3.1(+) plasmids, containing the human Nav1.2 channel with the L1563V or R1882Q mutations, were generated commercially (TOP Gene Technologies, Quebec, Canada). All clones were verified by automated DNA sequencing (Australian Genome Research Facility).

## CELL CULTURE AND TRANSFECTIONS

Chinese hamster ovary (CHO) cells were cultured in Dulbecco's Modified Eagle Medium: Nutrient Mixture F-12 (Thermo Fisher Scientific, Waltham, MA) supplemented with 10% (v/v) fetal bovine serum (Thermo Fisher Scientific) and 50 IU/ml penicillin (Thermo Fisher Scientific) at 37°C with 5% CO<sub>2</sub>. The cells were grown in T25 cm<sup>2</sup> flasks (BD Biosciences, San Jose, CA, USA) to ~80% confluency, and then transiently co-transfected with wild-type or mutant pcDNA3.1(+)-Nav1.2 (4 µg) and enhanced green fluorescent protein (eGFP; 1 µg; Clontech, Mountain View, CA), using Lipofectamine 3000 Reagent (Thermo Fisher Scientific). After transfections, cells were incubated at 37°C in 5% CO<sub>2</sub>. 24 hours post-transfection, the cells were detached using TrypLE Express Reagent (Thermo Fisher Scientific), plated on 13 mm diameter glass coverslips (Menzel-Gläser, Thermo Fisher Scientific), and incubated at 30°C in 5% CO<sub>2</sub>. Electrophysiological recordings were performed 48 to 72 hours post transfection.

## ELECTROPHYSIOLOGY

Cells were placed into a ~0.1 ml recording chamber and superfused with extracellular solution at a constant rate of ~0.2 ml/min. The extracellular bath solution contained 145 mM NaCl, 5 mM CsCl, 2 mM CaCl<sub>2</sub>, 1 mM MgCl<sub>2</sub>, 5 mM glucose, 5 mM sucrose, 10 mM Hepes (pH = 7.4 with NaOH and osmolarity of ~305 mosmol l<sup>-1</sup>), whereas the intracellular solution contained 5 mM CsCl, 120 mM CsF, 10 mM NaCl, 11 mM EGTA, 1 mM CaCl<sub>2</sub>, 1 mM MgCl<sub>2</sub>, 2 mM Na<sub>2</sub>ATP, 10 mM Hepes (pH = 7.3 with CsOH and osmolarity of ~290 mosmol l<sup>-1</sup>).

Experiments were performed at room temperature (23 ± 0.5 °C) set by a TC344B Dual Automatic Temperature Controller (Warner Instruments, Hamden, CT). Patch electrodes were pulled from borosilicate glass capillaries (GC150TF-7.5, Harvard Apparatus Ltd.) and typically exhibited resistance values of 1.2–1.5 MΩ. Liquid junction potentials were corrected and series resistance values, typically of 2–2.5MΩ, were 90–95% compensated. To minimize possible voltage errors, only relatively small CHO cells of 15–25 pF cell capacitance ( $C_m = 22 \pm 1$  pF,  $n = 168$ ), expressing peak  $I_{Na}$  amplitudes larger than 2 nA but smaller than 10 nA, were selected.  $I_{Na}$  amplitudes that fall outside the selected range would introduce errors in dynamic action potential clamp experiments (see below). Approximately 10-20% of the transfected cells showing green fluorescence did not express functional ion channel protein or exhibited peak  $I_{Na}$  values of very small (a few tens to a hundred pA) to small (<2 nA) amplitudes, and were excluded from analysis. Cells with peak  $I_{Na}$  values exceeding 10 nA, recorded in ~5-10% of cells expressing wild-type or L1563V channels, in less than 5% in cells expressing R853Q channels, and in ~10-20% of cells expressing R1882Q channels, were also excluded. Finally, cells were excluded from the analysis if the amplitude of the leak current at a holding potential (HP) of -120 mV was larger than 2% of the peak  $I_{Na}$ . The contribution of endogenous  $I_{Na}$  to the total  $I_{Na}$  was considered as negligible (11). The leak and capacitive currents were corrected using a -P/4 pulse protocol unless mentioned otherwise. In the experiments using tetrodotoxin,  $I_{Na}$  was determined as the current blocked by 100 nm tetrodotoxin (Alomone Laboratories, Israel).

The current density, voltage dependence of  $I_{Na}$  activation and inactivation, recovery from inactivation, and development of slow inactivation were determined using the voltage protocols depicted in the figures and explained in the Results. In most voltage clamp experiments, the HP was  $-120$  mV; however recovery from inactivation was determined from HP values of  $-120$  and  $-70$  mV, because recovery is voltage dependent (12) and, in dynamic clamp experiments (see below), the free running resting membrane potential ( $V_m$ ) of the AIS compartment model cell was approximately  $-70$  mV. Peak  $I_{Na}$  was defined as the difference between peak and steady-state currents recorded during depolarization and when keeping the cell at HP, respectively. Current-voltage ( $I$ - $V$ ) relationships were determined by measuring peak  $I_{Na}$  during 40-ms depolarizing voltage steps ranging from  $-80$  to  $+60$  mV, at 0.5 Hz. Peak  $I_{Na}$  was converted to peak conductance by the equation  $G = I/(V-V_{rev})$ , where  $V_{rev}$  is the sodium channel reversal potential. The resulting normalized conductance-voltage relationships are plotted as  $G/G_{max}$  values versus voltage and are referred to as 'activation' curves. The voltage dependence of steady-state fast inactivation was obtained using pre-pulses of 100 ms duration in 5 mV increments in the voltage range between  $-120$  and  $+10$  mV, followed by a 10-ms voltage step to  $-5$  mV. Steady-state activation and inactivation curves were fit using the Boltzmann equation:

$$\frac{G}{G_{max}} = \frac{1}{[1+e^{(V-V_{0.5})/k}]},$$

where  $V$  is the conditioning voltage,  $V_{0.5}$  is the half-maximal (in)activation voltage, and  $k$  is a slope factor. The steady-state open probability ( $P_o$ ) was estimated in the voltage range between  $-100$  mV and  $+40$  mV in 5 mV increments, by multiplying the values of fractional activation and inactivation. Results were expressed as the  $m \times h$  product as a function of  $V_m$  (13) and were fit with a bi-Gaussian peak function:

$$m = A e^{-0.5[\frac{x-x_c}{w_1}]^2}, x < x_c, \text{ and}$$

$$h = A e^{-0.5[\frac{x-x_c}{w_2}]^2}, x \geq x_c,$$

where  $m$  represents the probability that the channel is activated, and  $h$  is the probability that a channel is not inactivated,  $A$  represents the peak (height) of the curve,  $x_c$  represents the  $V_m$  value corresponding to the peak of the fitted curve,  $w_1$  and  $w_2$  represent the width of the  $V_m$  range of  $m$  and  $h$ , respectively. It should be noted that the  $m$  parameter for activation is derived directly from the measurement of  $G/G_{max}$ , different from the Hodgkin-Huxley  $m$  parameter based on  $m^3$  kinetics. The magnitude of the window current was estimated by calculating the overlapping area under the Boltzmann equations describing the activation and inactivation, in the voltage range between  $-100$  mV and  $+60$  mV as follows:

$$\text{Area} = \int_{-100}^{V_0} \frac{1}{1+e^{((V-V_{0.5,act})/k_{act})}} dV + \int_{V_0}^{+60} \frac{1}{1+e^{((V-V_{0.5,inact})/k_{inact})}} dV,$$

where  $V_0$  is the voltage value where the crossover of the activation and inactivation curves occurs,  $k_{act}$  and  $k_{inact}$  are the slope factors of activation and inactivation, respectively,  $V_{0.5,act}$  and  $V_{0.5,inact}$  are the  $V_m$  values for half-maximal voltage of activation and inactivation, respectively. The window current was expressed as percent of total area (Table 2). It should be noted that this procedure is only an approximate method to predict steady-state current, because the activation curve does not accurately represent steady-state activation, as it is derived from a measurement of non-steady-state peak transient current, where activation may not be at steady-state and inactivation has already progressed to some degree. Persistent  $I_{Na}$ , expressed as percent of peak  $I_{Na}$ , was determined at 40 ms after the onset of the step voltage command by either subtracting traces recorded in the presence of tetrodotoxin from control, or by estimating inward  $I_{Na}$  after  $-P/4$  leak correction. Both methods resulted in similar values and for comprehensive mutant and wild-type data analysis the  $-P/4$  method was used. To determine the time constants of peak  $I_{Na}$  inactivation elicited at various voltages, the time course of individual  $I_{Na}$  traces was fitted with a double-exponential equation:

$$\frac{I}{I_{max}} = A_f e^{-t/\tau_f} + A_s e^{-t/\tau_s},$$

where  $t$  is time,  $A_f$  and  $A_s$  are the fractions of the fast and slow inactivation components, and  $\tau_f$  and  $\tau_s$  are the time constants of the fast and slow inactivating components, respectively. The fast time constant ( $\tau_f$ ) was plotted against the test potential  $V$ , in the range between  $-40$  mV and  $+10$  mV. Voltage dependence of recovery from (fast) inactivation was assessed from HP values of either  $-120$  or  $-70$  mV with a paired-pulse protocol comprising a 10 ms pre-pulse to  $-10$  mV (P1), which served to fast-inactivate the  $I_{Na}$ , followed by a test pulse to  $-10$  mV (P2), to measure  $I_{Na}$  availability after variable recovery intervals. Recovery was analysed by fitting a single exponential function to the data to obtain the time constant,  $\tau$  as follows:

$$\frac{I}{I_{\max}} = 1 - e^{-t/\tau},$$

where  $t$  is time (here the delay between pre-pulse P1 and test pulse P2). To evaluate the rate of entry into slow inactivation that develops during prolonged membrane depolarization or repeated high-frequency firing (14, 15), the HP was kept at  $-60$  mV for time intervals of increasing duration (0.005s-195s). Between the intervals, the membrane was hyperpolarized to  $-120$  mV for 20 ms, allowing channels recover from fast inactivation, and then  $I_{Na}$  availability was assessed with a 2-ms test pulse to  $-10$  mV. In similar experiments, we also determined the entry into slow inactivation at  $-50$  mV for wild-type and mutant currents, respectively. The development of slow inactivation was evaluated by fitting data with the double-exponential equation above.

## **PARAMETERS OF ACTION POTENTIALS AND INPUT $I_{Na}$ IN DYNAMIC CLAMP EXPERIMENTS**

Rheobase was determined as the minimal stimulus current needed to elicit an action potential. Input-output relationships were determined as the number of action potentials elicited during injections of step currents of 500 ms or 1 s duration, or as the firing frequency of the model cell in response to synaptic currents of various  $g_e:g_i$  ratios during 5 s recordings. Action potential upstroke velocity was defined as the maximum value of the first derivative of the action potential waveform. Action potential threshold was determined at the 10 mV/ms upstroke velocity value, using the first derivative method. The action potential half-width was measured as the period between the trace's crossing the half-amplitude point in its rising and decaying stages. The amplitude of the input  $I_{Na}$  was determined during action potential firing. All action potential and  $I_{Na}$  parameters were determined using Clampfit except action potential rise (upstroke velocity), which was estimated in Axograph X (Axograph Scientific, Sydney, Australia).

## PORE CURRENT RECORDINGS

The extracellular bath solution contained 125 mM NaCl, 20 mM guanidine-sulfate, 2 mM CaCl<sub>2</sub>, 1 mM MgCl<sub>2</sub>, 10 mM HEPES (pH = 7.3 with NaOH), whereas the intracellular solution contained 135 mM CsF, 5 mM NaCl, 1 mM EGTA, 10 mM HEPES (pH = 7.3 with NaOH). In some experiments, the extracellular solution contained 60 mM guanidine-sulfate instead of 20 mM.

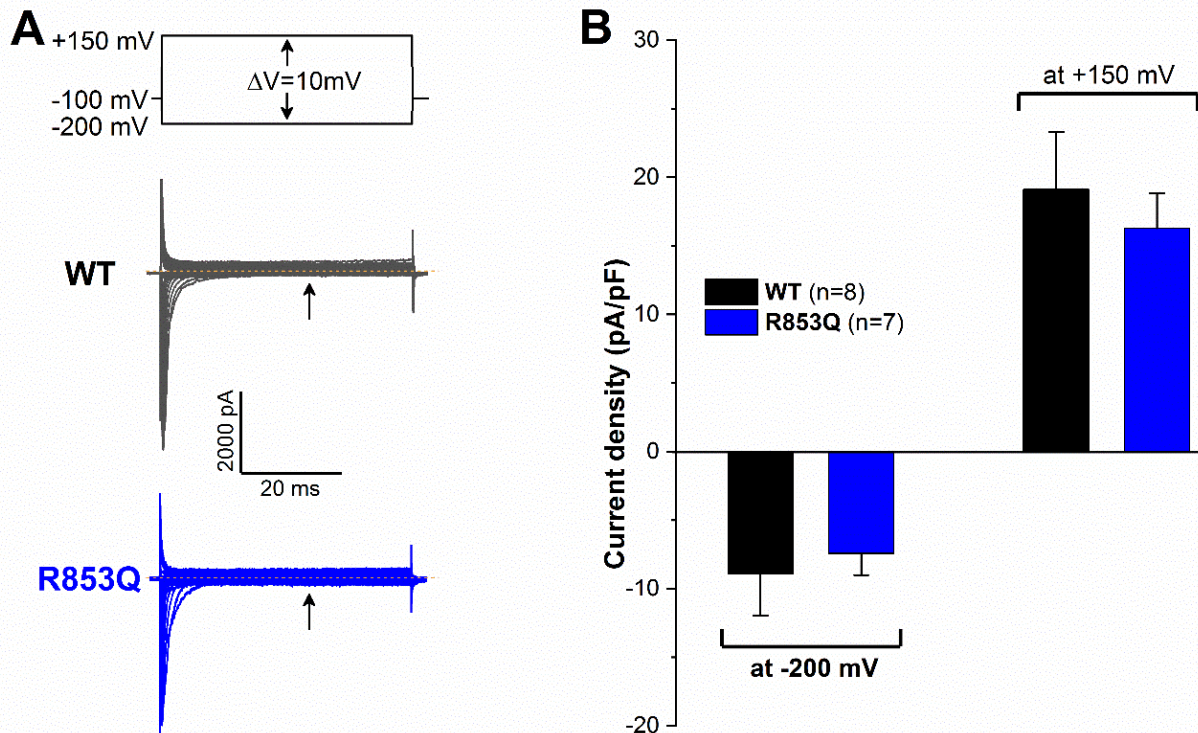

**Supplemental Figure S1.** Inward and outward currents in CHO cells transiently expressing wild-type or R853Q Nav1.2 channels. (A) Representative wild-type (WT) and R853Q  $I_{Na}$  traces, elicited by 50-ms voltage steps of 10 mV increment from a holding potential (HP) of -100 mV (top inset). To establish presence of pore currents, current amplitude was measured at 30 ms after the onset of the step voltage command (arrow). Dotted lines indicate zero current level; P/N leak subtraction was turned off. (B) Current densities determined at HP values of -200 and +150 mV, respectively. Increasing the concentration of guanidine-sulfate to 60 mM in the extracellular solution (16) did not affect the current amplitude ( $n = 3$ ). Data are mean  $\pm$  SEM;  $n$ , number of experiments between parentheses.



## ROBUSTNESS OF THE AXON INITIAL SEGMENT (AIS) COMPARTMENT MODEL IN DYNAMIC ACTION POTENTIAL CLAMP EXPERIMENTS

To evaluate the effects of altering various model features on the firing activity in the presence of external wild-type or mutant  $I_{NaV1.2}$  channel current ( $I_{NaV1.2}$ ) inputs, the capacitance ( $C_m$ ) and/or the scaled individual conductances of the model cell were systematically varied.  $C_m$  was altered across a range from 0.5 to 1.5 of original parameter value, potassium channel's conductance ( $g_{Kv}$ ) was altered from 0.25 to 7-fold from original, and  $Na_v1.6$  channel conductance ( $g_{Na_v1.6}$ ) was changed from 0.2 to 1.5. We also altered the scaling of the input wild-type or mutant  $I_{NaV1.2}$  from 0.6 to 1.2 to test the relationship between this parameter and the predictions of the model. The virtual  $Na_v1.6$  current ( $I_{Na_v1.6}$ ) was set to zero unless stated otherwise and the model was run at 23°C to match  $I_{NaV1.2}$  recording conditions. The external  $I_{NaV1.2}$  and the virtual  $V_m$ ,  $I_{syn}$ ,  $g_e$ ,  $g_i$ ,  $I_{Kv}$ , and  $I_{Na_v1.6}$  were simultaneously recorded. Action potential firing was elicited in response to synaptic currents or in response to step current stimuli.

As expected, the firing frequency tracked with parameter value changes in a predictable fashion and no unexpected findings or strange bifurcations were observed, suggesting that the model itself was stable across this range of parameter values.

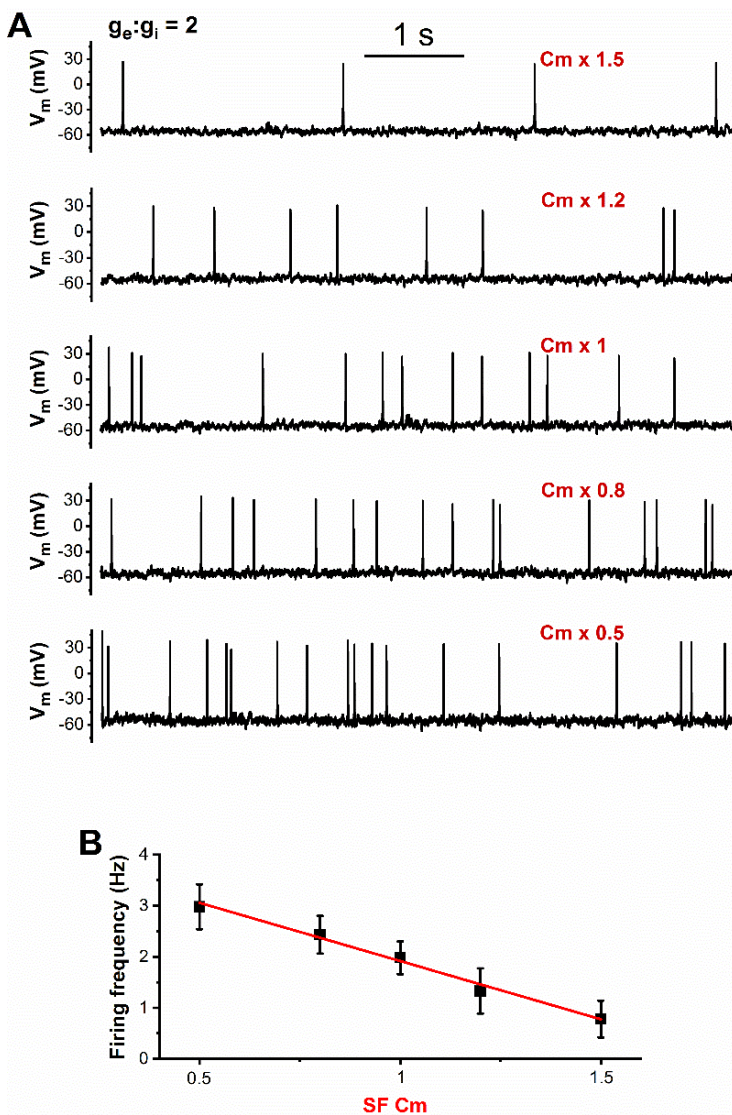

**Supplemental Figure S2.** Effects of varying the capacitance ( $C_m$ ) of the AIS compartment on firing activity. (A) Reducing the  $C_m$  increases the firing rate.

Representative firing responses elicited by a synaptic current of excitatory ( $g_e$ ) to inhibitory ( $g_i$ ) conductance ratio ( $g_e:g_i$ ) of 2. The amplitude of the wild-type input  $I_{NaV1.2}$  was set to 350-375 pA. (B) Relationship between the firing frequency and scaled  $C_m$ . Data are presented as mean  $\pm$  SEM,  $n$ , number of independent experiments = 4. Data were fit with a linear equation of type  $y = mx + b$ , where  $m$  (slope) =  $-2.28 \pm 0.14$ .

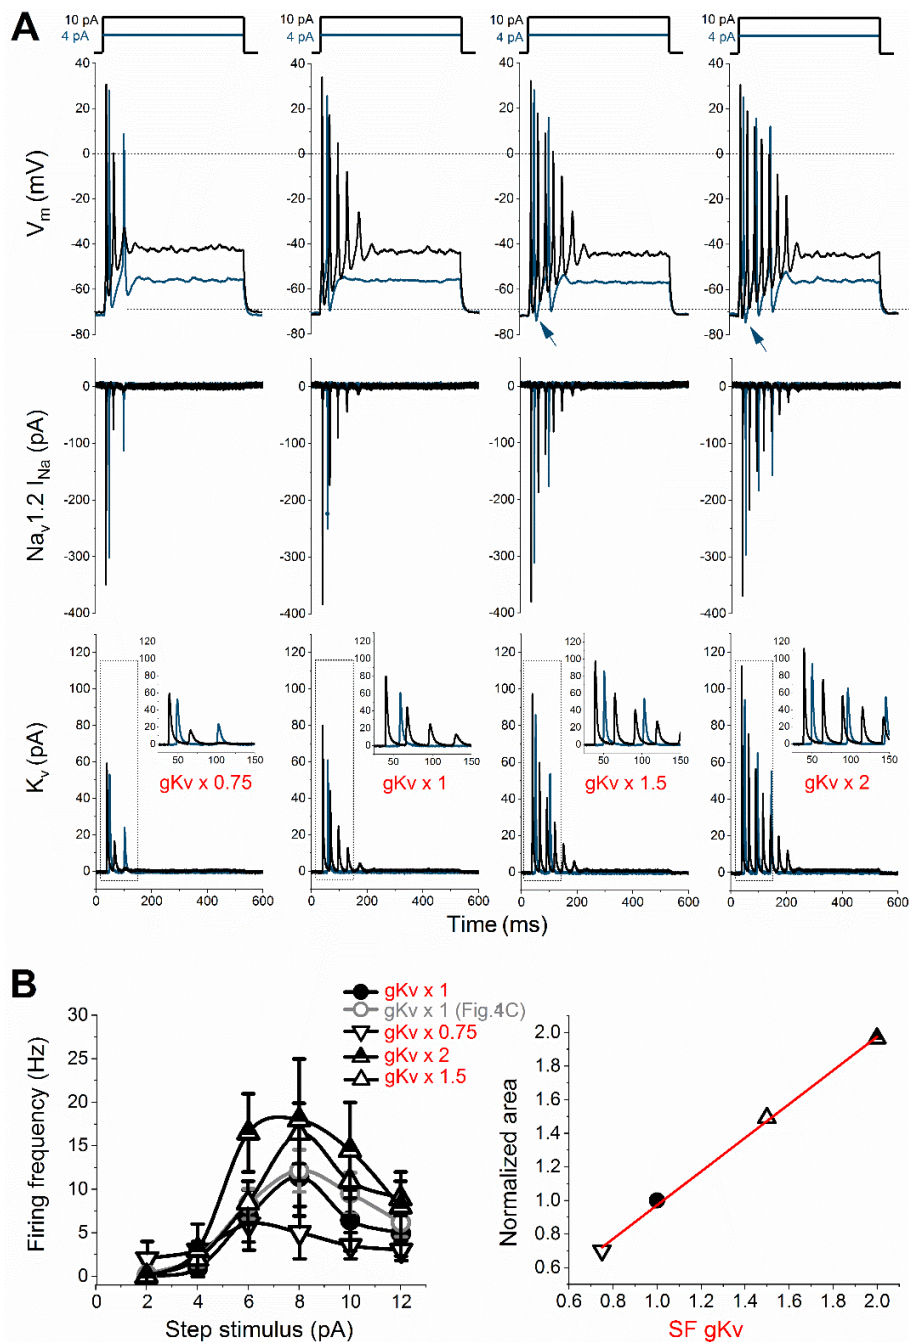

**Supplemental Figure S3.** The effect of altered gKv on AIS compartment model activity in response to step current ( $I_{st}$ ) stimulation (**A**) Representative action potential firing (upward deflections, top), elicited by 4 or 10 pA  $I_{st}$  steps (top insets); associated wild-type input  $I_{Nav1.2}$  (downward deflections, middle), and virtual potassium current ( $I_{Kv}$ ) (upward deflections, bottom); note boxed  $I_{Kv}$  traces on an expanded time scale. (**B**) Input-output relationships with the original AIS model cell gKv scaled to the indicated values (left). Action potentials were elicited by  $I_{st}$  of 500 ms duration in 2 pA increments between 2 and 12 pA. Note that the input-output curve with wild-type input  $I_{Nav1.2}$  from Fig. 4C is re-plotted for comparison (grey symbols). Data are presented as mean  $\pm$  SEM; for each data point  $n \geq 4$ . Note the increase of firing activity with increasing gKv values. Relative to gKv < 1, the  $V_m$  is more efficiently repolarized below action potential threshold with gKv > 1 (arrows), facilitating the recovery of  $Na_v$  channels from inactivation. This transient repolarizing effect is counteracted by the  $I_{st}$  that efficiently depolarizes the  $V_m$  to threshold for action potential firing. Right: Relationship between overall firing and scaled gKv, expressed as the normalized area under the corresponding input-output curve shown in the left panel (slope of the linear fit is  $1.00 \pm 0.02$ ).

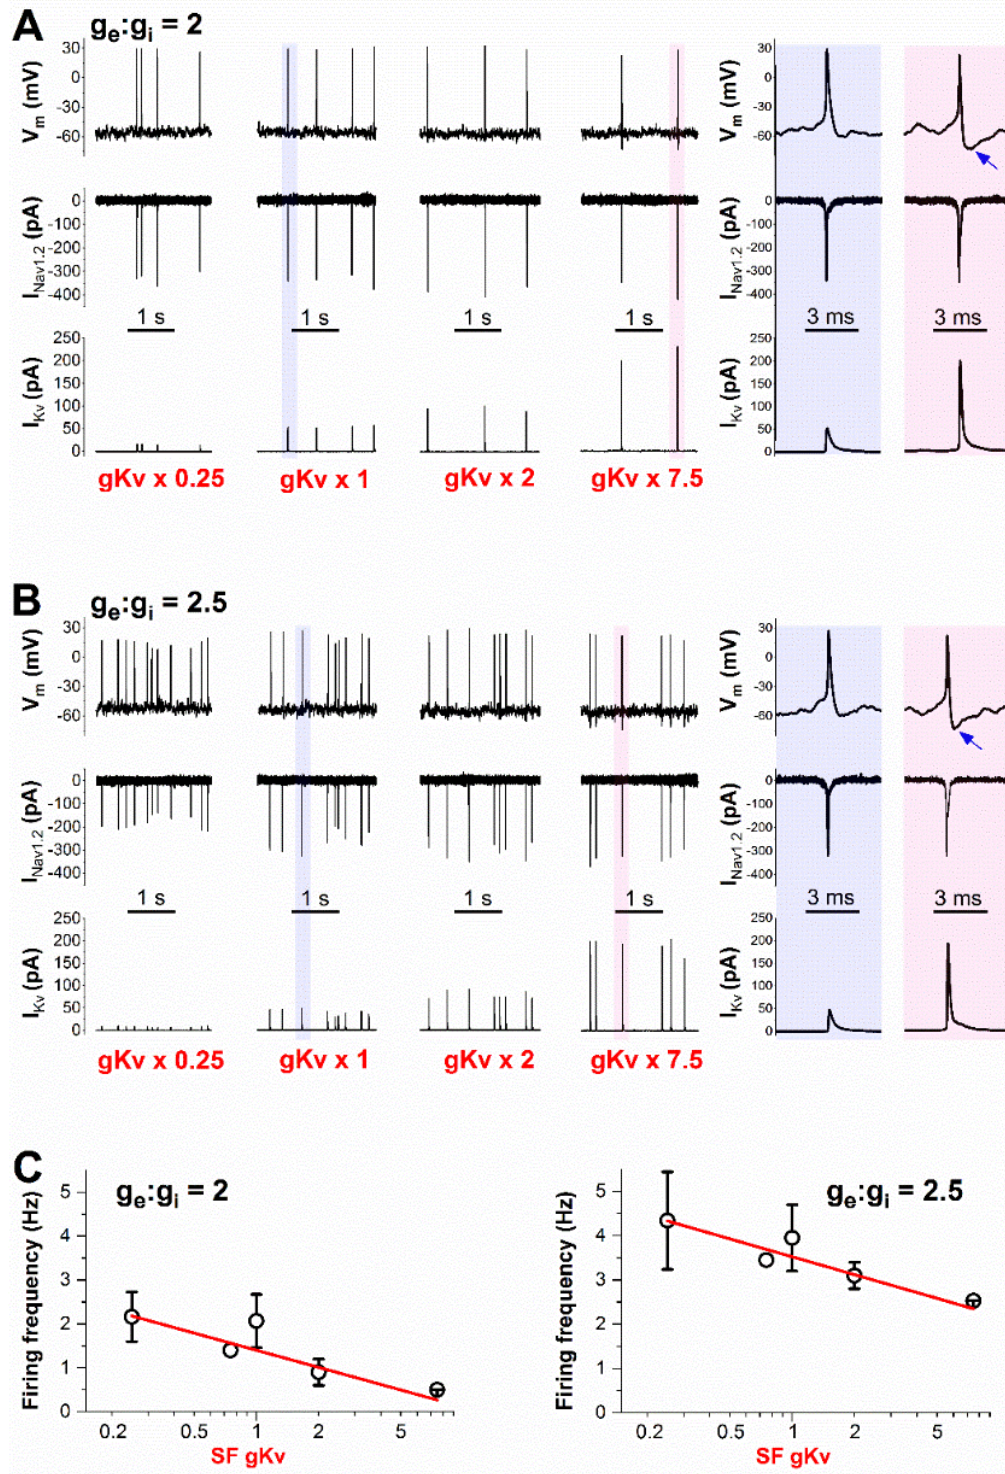

**Supplemental Figure S4.** The effect of scaling  $g_{Kv}$  on AIS compartment model activity in response to synaptic current stimulation. Representative examples of firing elicited with  $g_e:g_i = 2$  (A) or  $g_e:g_i = 2.5$  (B), respectively. Right: shaded boxes show  $V_m$ , wild-type  $I_{Nav1.2}$ , and  $I_{Kv}$  traces on expanded time scale. (C) Input-output relationships as a function of  $g_e:g_i$ . Note that  $g_{Kv}$  scaling produces relatively small changes in firing frequency; large  $g_{Kv}$  values transiently hyperpolarize the membrane potential (arrows). Data are presented as mean  $\pm$  SEM; for each data point  $n \geq 4$ , except for SF = 0.8 and 7 ( $n = 1$  for both). The slopes of the linear fits to the data were  $-1.29 \pm 0.05$  (left) and  $-1.34 \pm 0.01$  (right).

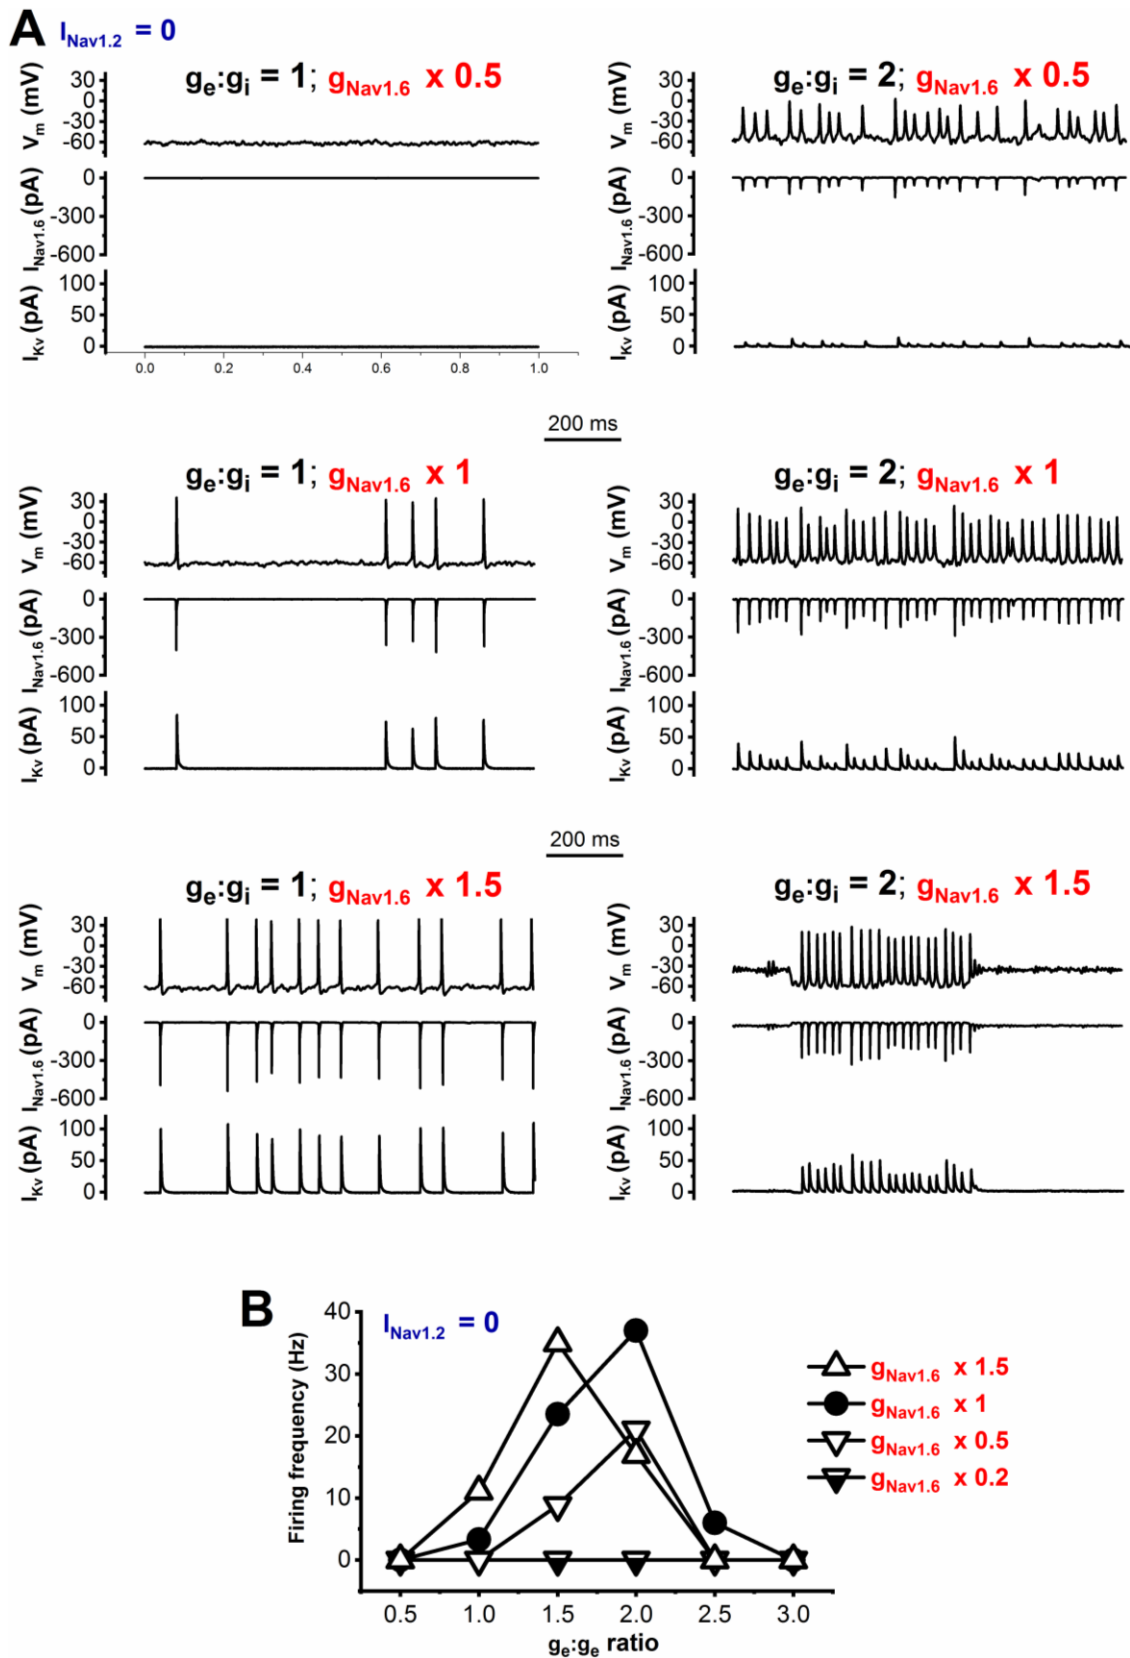

**Supplemental Figure S5.** The effect of scaling the virtual  $I_{Nav1.6}$  on the AIS compartment model activity in response to synaptic stimulation. The external input  $I_{Nav1.2}$  (also called  $I_{cell}$ ; see Appendix) was set to zero. (A) Representative examples of  $V_m$  changes, associated  $I_{Nav1.6}$  and  $I_{Kv}$  traces, elicited at  $g_e:g_i = 1$  or  $2$ , respectively. The effects of reducing control ( $g_{Nav1.6} = 1$ ) by 50 % or increasing it by 50 %, respectively, are shown. (B) Input-output relationships as a function of  $g_e:g_i$  ratios, with  $I_{Nav1.6}$  scaled to the indicated values. Data represent mean; for each data point  $n = 2$ .

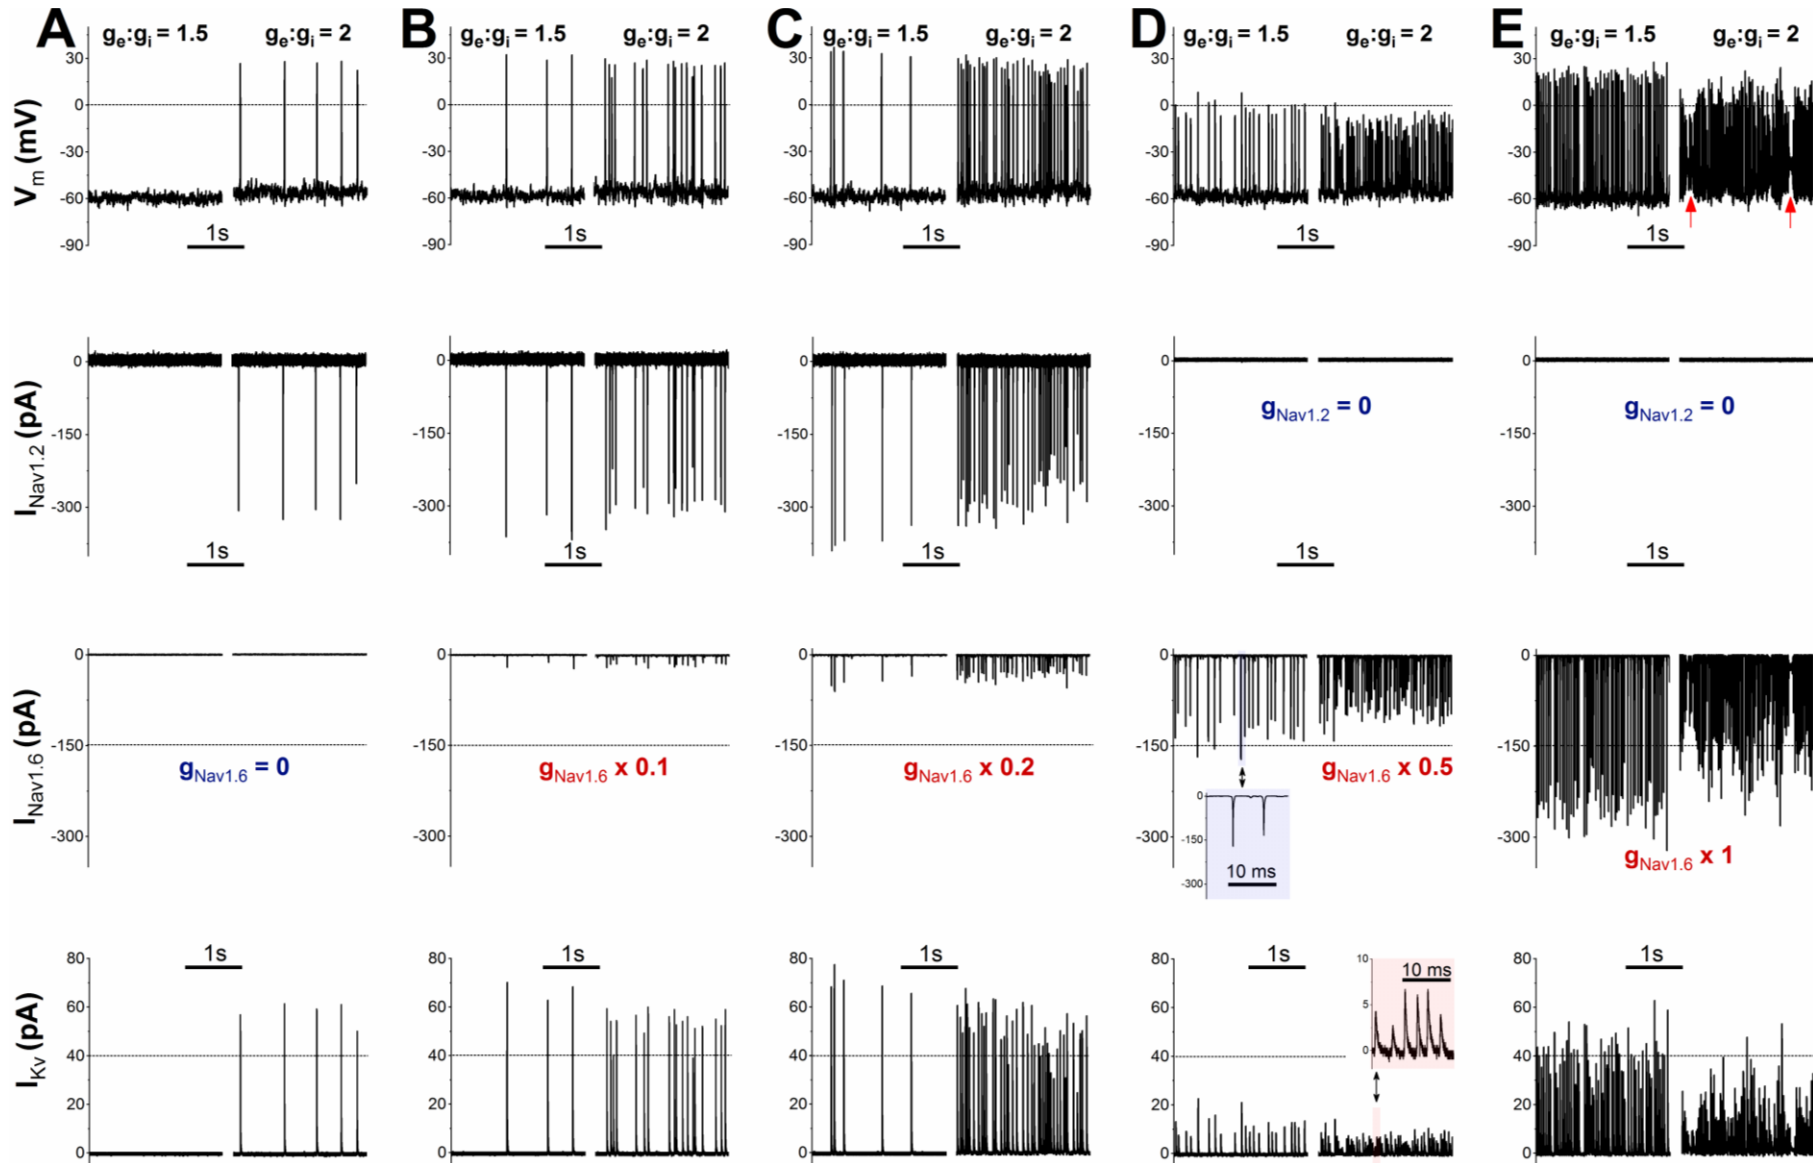

**Supplemental Figure S6.** The contribution of heterologously expressed wild-type  $I_{Nav1.2}$  and/or virtual  $I_{Nav1.6}$  to AIS compartment model activity. Activity is sensitive to the magnitude of individual  $Na_v1.2$  and  $Na_v1.6$  conductances. Representative  $V_m$  changes (upward deflections, first row), associated wild-type input  $I_{Nav1.2}$  (downward deflections, second row),  $I_{Nav1.6}$  (downward deflections, third row), and  $I_{Kv}$  (upward deflections, fourth row) at  $g_e:g_i = 1.5$  or  $2$  are shown. **(A)** Firing activity with  $I_{Nav1.6}$  set to zero (control). See also main manuscript Fig. 5 for comparison. **(B, C)** Introducing virtual  $I_{Nav1.6}$  reduced to 10 or 20 % of control into the model cell while keeping  $I_{Nav1.2}$  unchanged, results in a considerably increased activity. **(D, E)** Typical firing in response with  $I_{Nav1.2}$  set to zero and  $g_{Nav1.6}$  set to 0.5 or 1. The latter value results in depolarization block at  $g_e:g_i = 2$  (red arrows). Shaded insets in D show typical  $I_{Nav1.6}$  and  $I_{Kv}$  traces on expanded time scale.

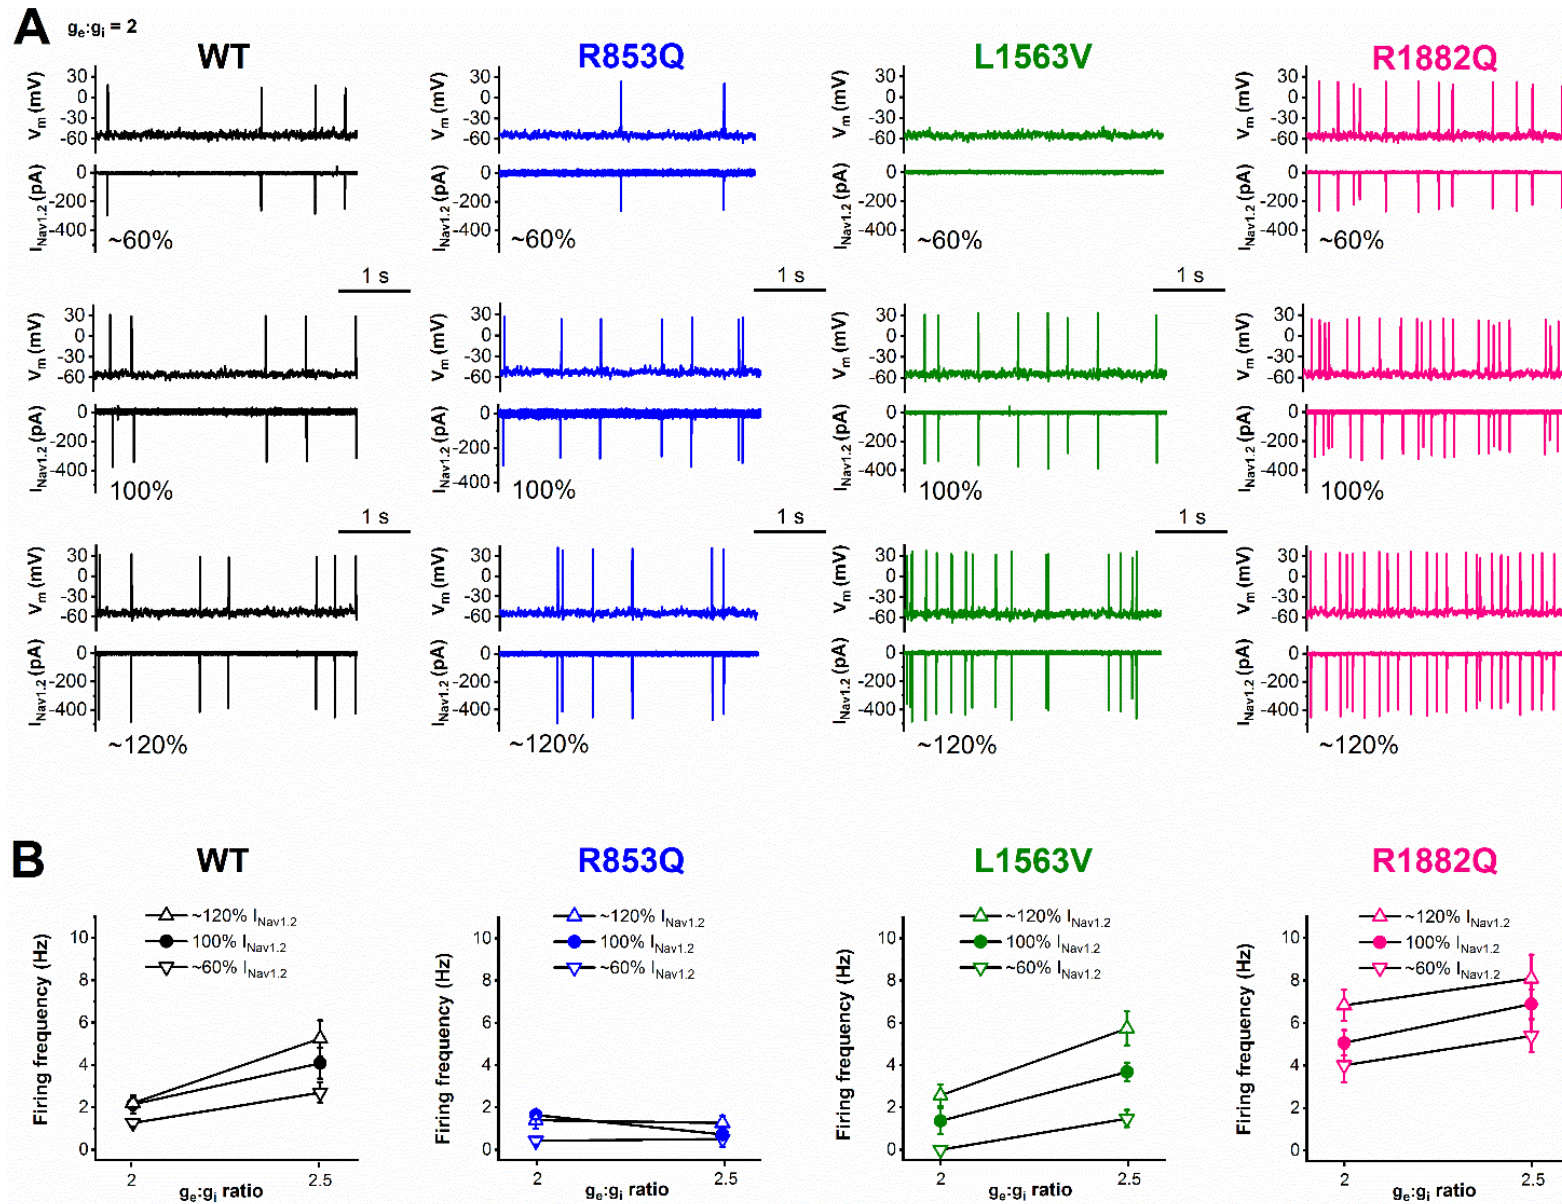

**Supplemental Figure S7.** The effect of scaling the wild-type or mutant input  $I_{Nav1.2}$  on AIS compartment model activity. **(A)** Representative activities in response to a synaptic stimulation of  $g_e:g_i = 2$ . The input  $I_{Nav1.2}$  was reduced (60 %) or increased (120 %) compared to control (100%).  $V_m$  changes (upward deflections) and associated scaled input  $I_{Nav1.2}$  (downward deflections) are shown. Note the overall firing rate-increase with the R1882Q variant. **(B)** Average firing activity in response to synaptic stimulation of  $g_e:g_i = 2$  or 2.5, with scaled input  $I_{Nav1.2}$ . Data are presented as mean  $\pm$  SEM; for each data point  $n \geq 4$ .

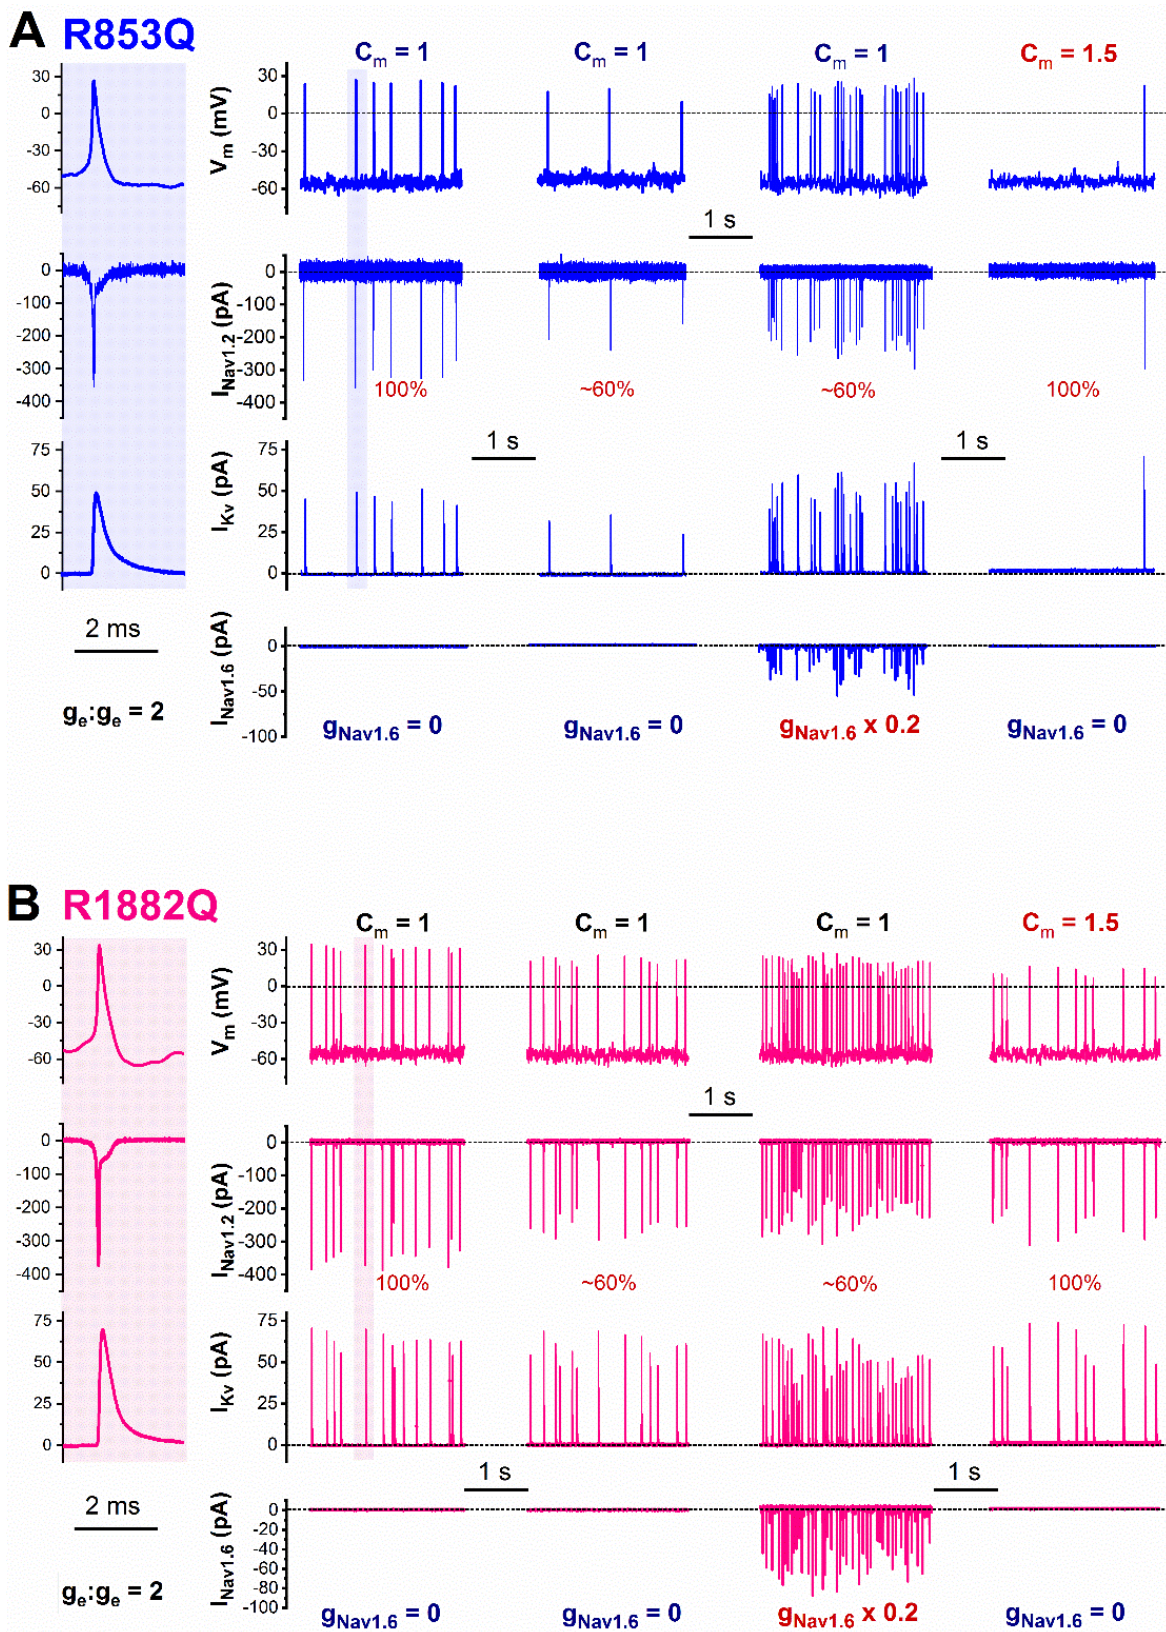

**Supplemental Figure S8.** Representative action potentials and associated currents in dynamic action potential clamp experiments implementing wild-type (**A**) or R1882Q  $I_{Nav1.2}$  (**B**). The effect of reducing the input  $I_{Nav1.2}$  (60 % of control), reducing  $I_{Nav1.2}$  (60 % of control) and introducing  $I_{Nav1.6}$  (20 % of control), or increasing  $C_m$  (by 50 % compared to control). Shaded boxes (left) show typical action potentials and associated  $I_{Nav1.2}$  and  $I_{Kv}$  traces on expanded time scale. Note the overall higher activity recorded in the AIS model in the presence of R1882Q  $I_{Nav1.2}$  compared to R853Q ( $n \geq 3$  for both A and B).

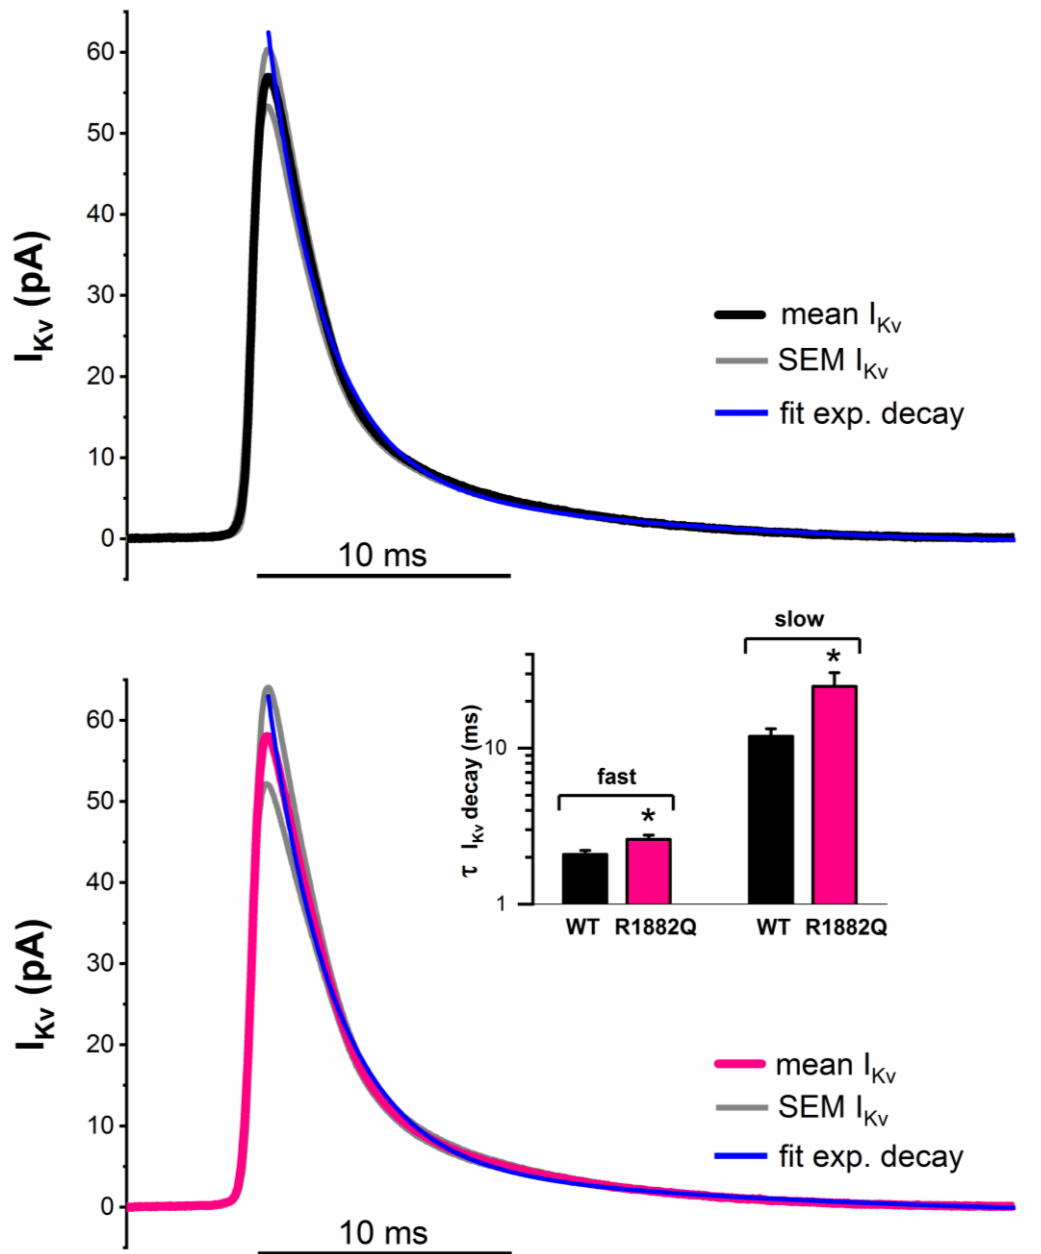

**Supplemental Figure S9.** The magnitude of  $I_{Kv}$  and the time course of  $I_{Kv}$  decay in dynamic clamp experiments implementing wild-type ( $n = 5$ , top) or R1882Q  $I_{Nav1.2}$  ( $n = 4$ , bottom). Mean  $I_{Kv}$  was determined by averaging the first eight to twelve action potential-associated  $I_{Kv}$  traces using data shown in Fig. S7 (at  $g_e:g_i = 2$ ). For both ‘wild-type’ and ‘R1882Q’, the peak  $I_{Kv}$  values were similar,  $56.9 \pm 3.5$  pA and  $58.1 \pm 5.9$  pA, respectively. The time course of mean  $I_{Kv}$  decay was fitted with a double-exponential equation (blue traces, top and bottom panels):

$$\frac{I}{I_{\max}} = A_f e^{-t/\tau_f} + A_s e^{-t/\tau_s},$$

where  $t$  is time,  $A_f$  and  $A_s$  are the fractions of the fast and slow inactivation components, whereas  $\tau_f$  and  $\tau_s$  are the time constants of the fast and slow inactivating components, respectively. Note that  $I_{Kv}$  traces in grey represent SEM. With wild-type or R1882Q input  $I_{Nav1.2}$ , the mean  $\pm$  SEM values of  $\tau_f$  were  $2.1 \pm 0.1$  or  $2.6 \pm 0.2$  ms, whereas the mean  $\pm$  SEM  $\tau_s$  values were  $11.9 \pm 1.4$  or  $24.9 \pm 5.59$  ms, respectively (inset bar graph; \* $P < 0.05$ , Student’s  $t$ -test).



# APPENDIX

## Simulink model of a single compartment axon initial segment (AIS)

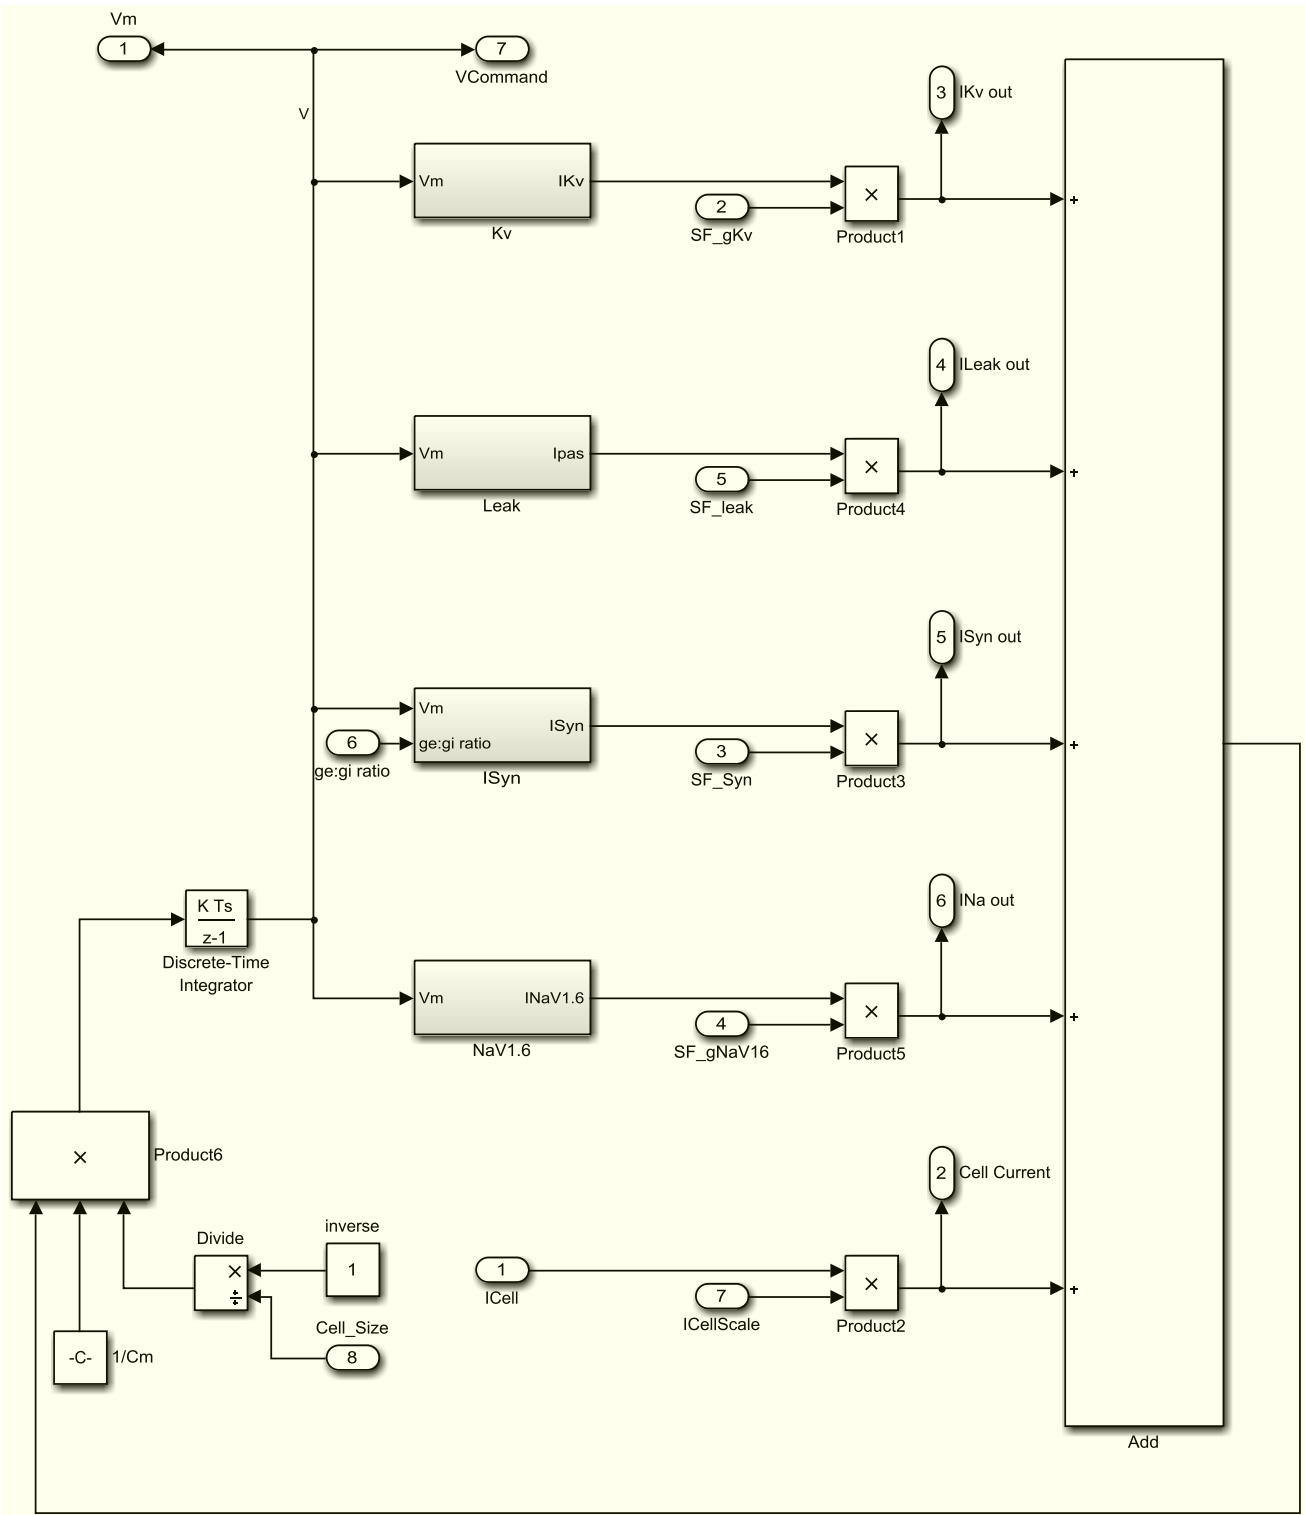

**Figure A1.** Simulink model of the AIS compartment implementing scalable cell capacitance ( $C_m$ ) and scalable (SF) currents, including voltage dependent potassium current ( $I_{Kv}$ ), passive leak current ( $I_{pas}$ ), voltage dependent  $Na_v1.6$  current ( $I_{Na_v1.6}$ ), excitatory and inhibitory synaptic currents ( $I_{Syn}$ ), and heterologously expressed input  $Na_v1.2$  current ( $I_{Cell}$ ).

The characteristics of passive and active components of our AIS compartment model are identical to the published model and are described in detail in the online version of paper by Hu et al (17). The Hu model is based on a previously published multi-compartment model underlying the full dendritic and somatic structure of a layer 5 cortical pyramidal cell (18), containing sodium current data (19, 20) and potassium current data (20, 21) obtained at room temperature (23°C). Our compartment model has uniformly distributed ion channels and it is run at 23°C to match  $I_{NaV1.2}$  recording conditions. Similarly, our synaptic noise model is also based on published data (22).

At each iteration of the model, the  $V_m$  is calculated by solving the equation:

$$(C * CellSize) \frac{dV_m}{dt} = SF_{gKv} * I_{Kv} + SF_{leak} * I_{pas} + SF_{Syn} * I_{Syn} + SF_{gNaV1.6} * I_{NaV1.6} + I_{CellScale} * I_{Cell}$$

where  $C$  is the capacitance of the compartment,  $CellSize$  is a scaling factor to change cell size and  $V_m$  is the membrane potential.  $SF_{gKv}$ ,  $SF_{leak}$ ,  $SF_{Syn}$ ,  $SF_{gNav}$ , and  $I_{CellScale}$  are scaling factors for  $I_{Kv}$ ,  $I_{pas}$ ,  $I_{Syn}$ , and  $I_{NaV1.6}$ , respectively, whereas  $I_{CellScale}$  is the scaling factor for  $I_{Cell}$  (the external input  $Na_{v1.2}$  current). In all experiments, the voltage dependent  $Na_{v1.6}$  current was set to zero unless stated otherwise.

The panels below show the nested models of the individual current components described using the Hodgkin-Huxley formalism (23).

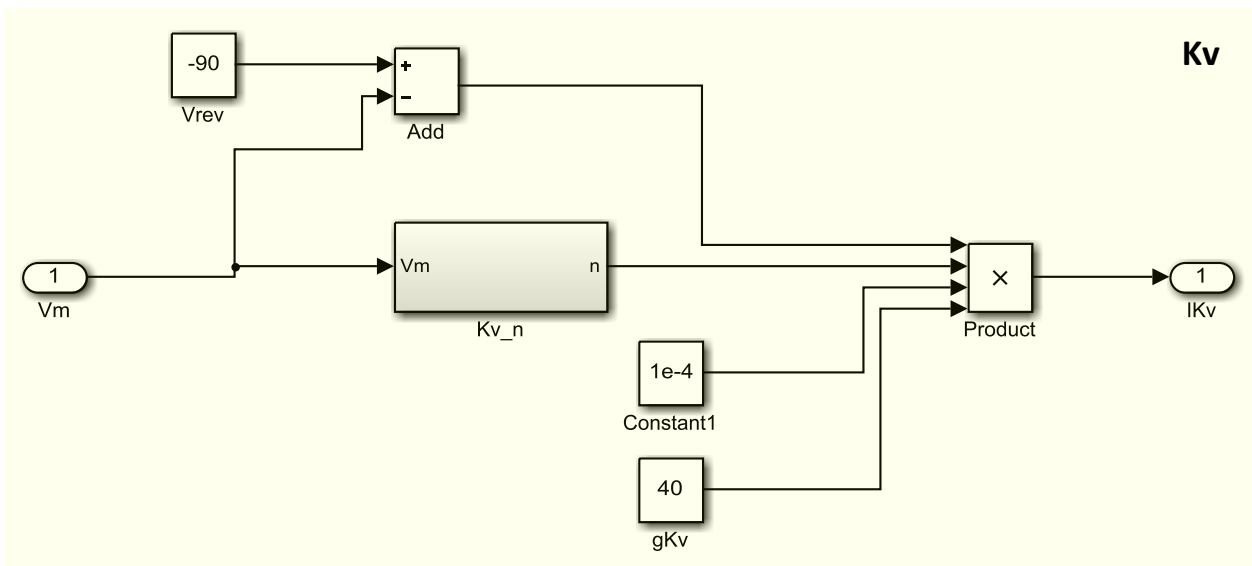

**Figure A1.1. Potassium current (Kv)**

$$I_{Kv} = gKv * n(Vm - (-90)),$$

where  $gKv = 40 \text{ pS}\mu\text{m}^{-2}$  is the potassium conductance and  $n$  is the activation gate.

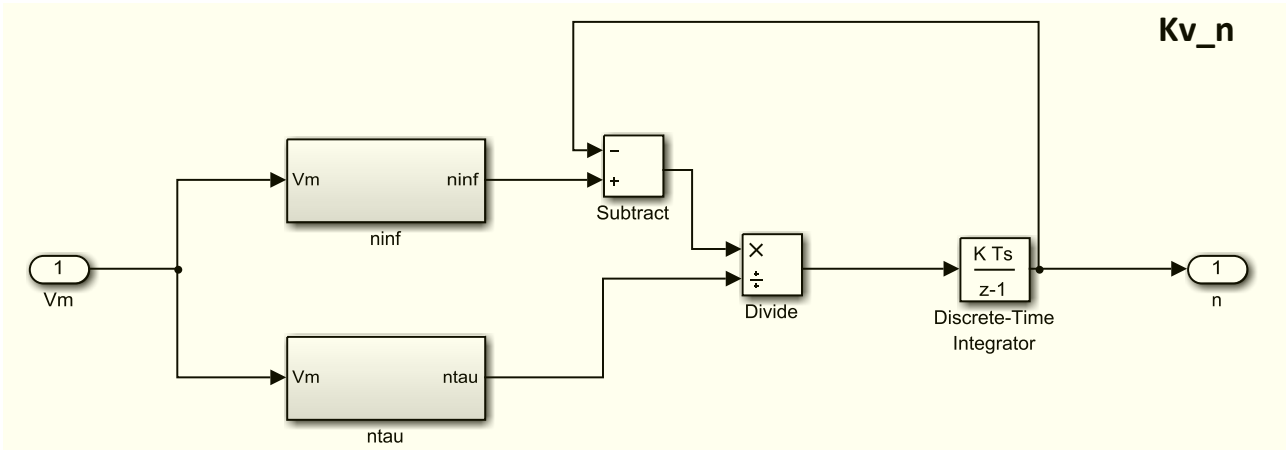

Figure A1.1.1. Potassium channel activation gate ( $Kv_n$ )

$$\frac{dn}{dt} = \frac{n_{inf} - n}{n_{tau}}$$

where  $n_{inf}$ ,  $n_{tau}$  are the steady-state activation variable and time constant of activation, respectively.

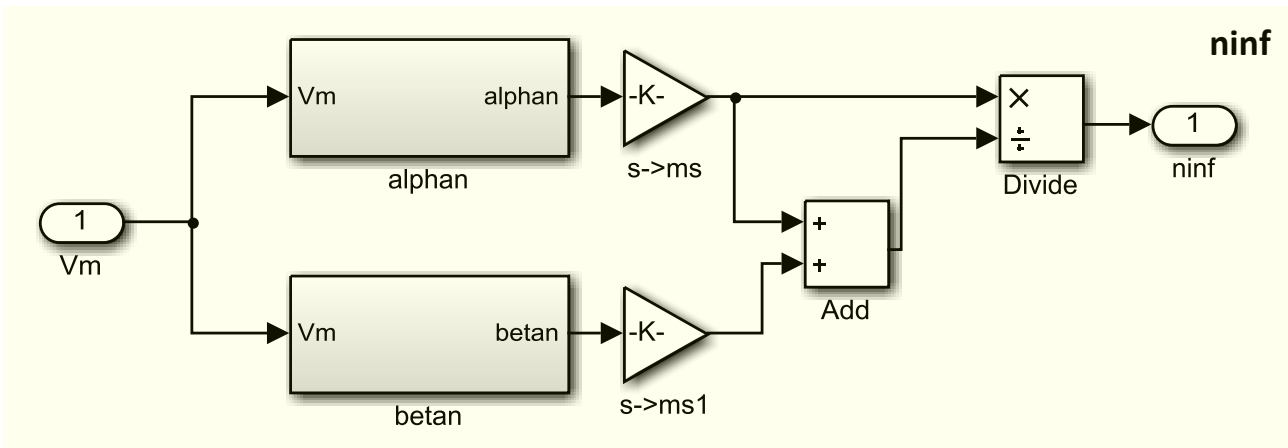

Figure A1.1.1.1. Steady state activation of potassium ion channel ( $ninf$ ).

$$ninf = \frac{alphan}{alphan + betan}$$

where  $alphan$  and  $betan$  are rate constants of potassium activation.

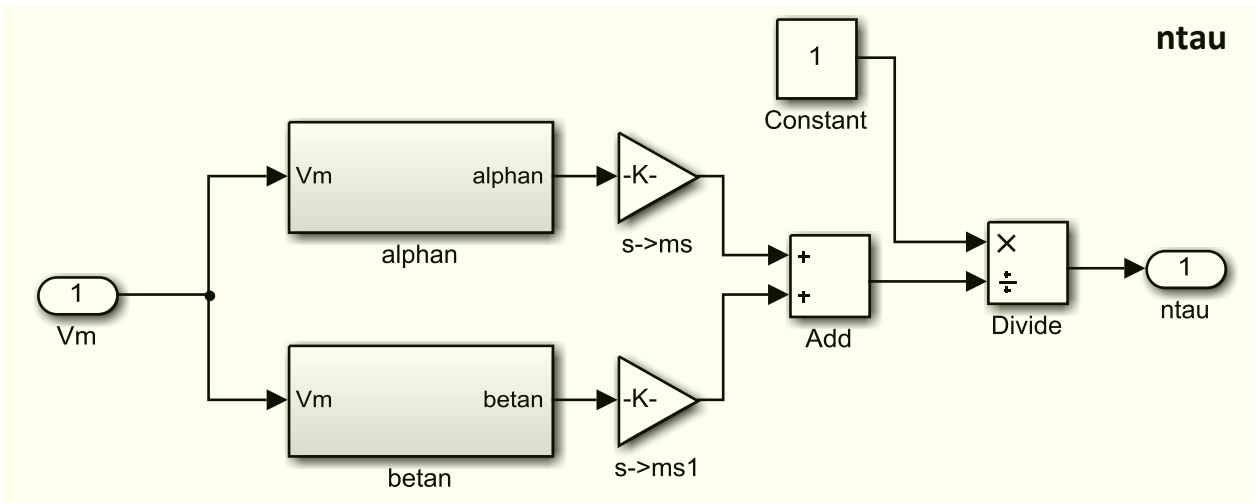

**Figure A1.1.1.2. Activation time constant of potassium ion channel (ntau).**

$$ntau = \frac{1}{alphan + betan}$$

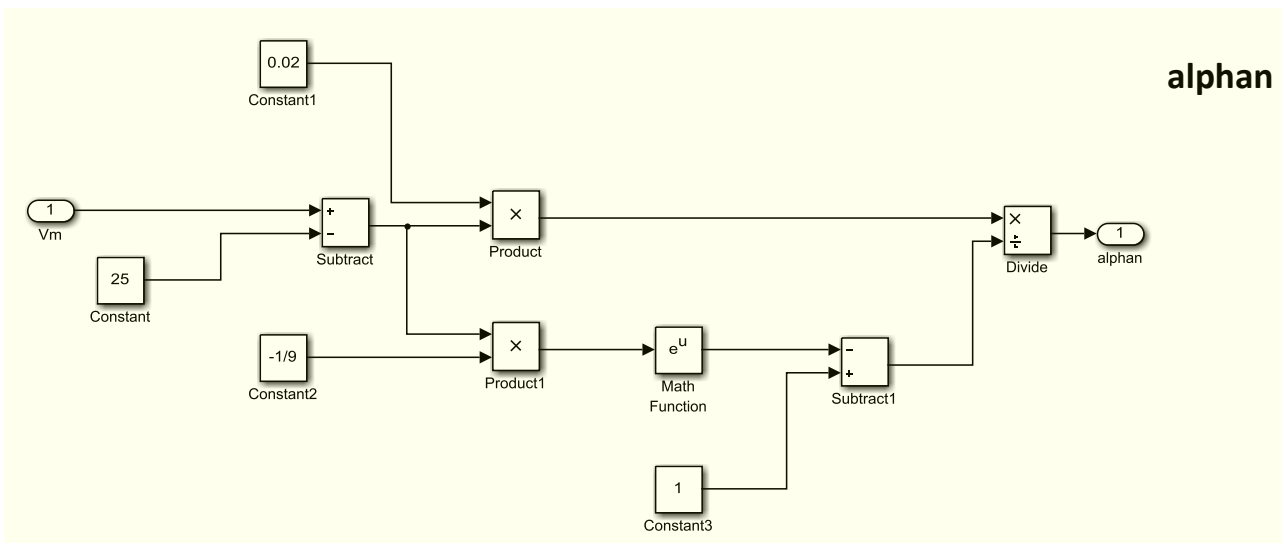

**Figure A1.1.1.2.1. Rate constant (alphan).**

$$alphan = \frac{0.02(Vm - 25)}{1 - \exp\left(-\frac{Vm - 25}{9}\right)}$$

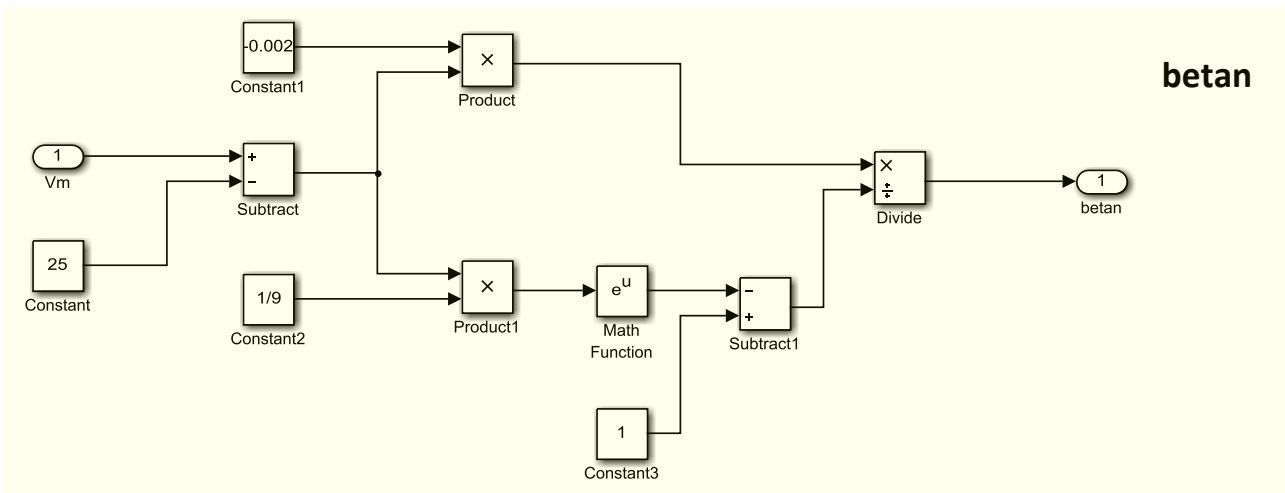

Figure A1.1.1.2.2. Rate constant (betan).

$$betan = \frac{-0.002(Vm - 25)}{1 - \exp\left(\frac{Vm - 25}{9}\right)}$$

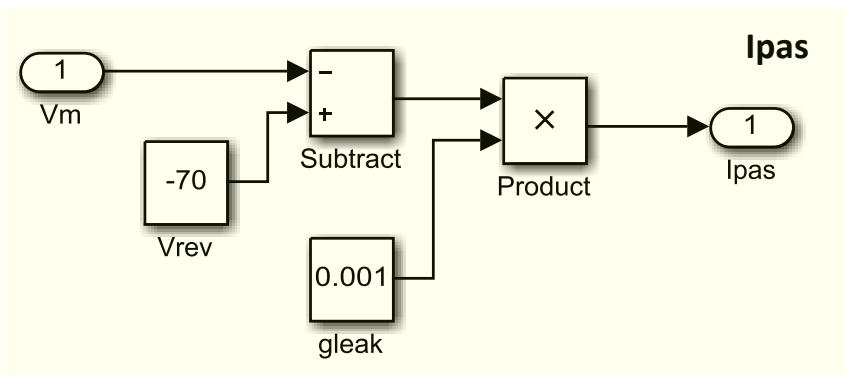

Figure A1.2. Leak current (Ipas).

$$Ipas = 0.001 * (Vm - (-70))$$

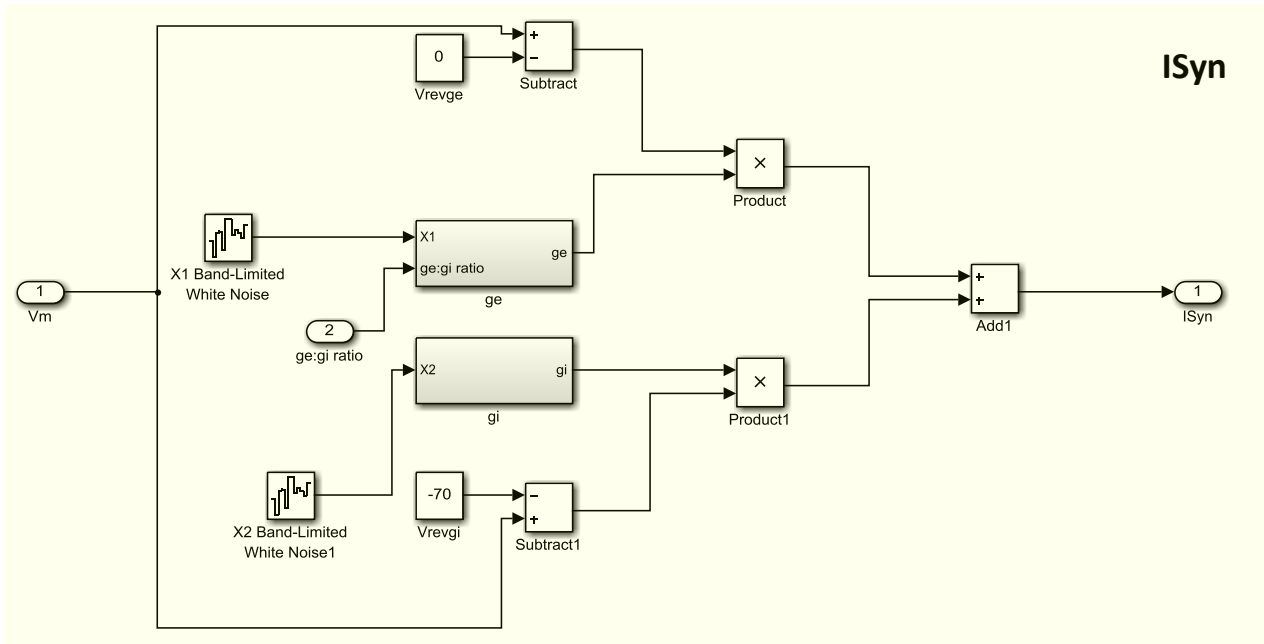

**Figure A1.3. Synaptic current (ISyn).**

$$ISyn = ge(Vm - 0) + gi(Vm - (-70)),$$

where  $ge, gi$  are excitatory and inhibitory synaptic conductances, respectively.

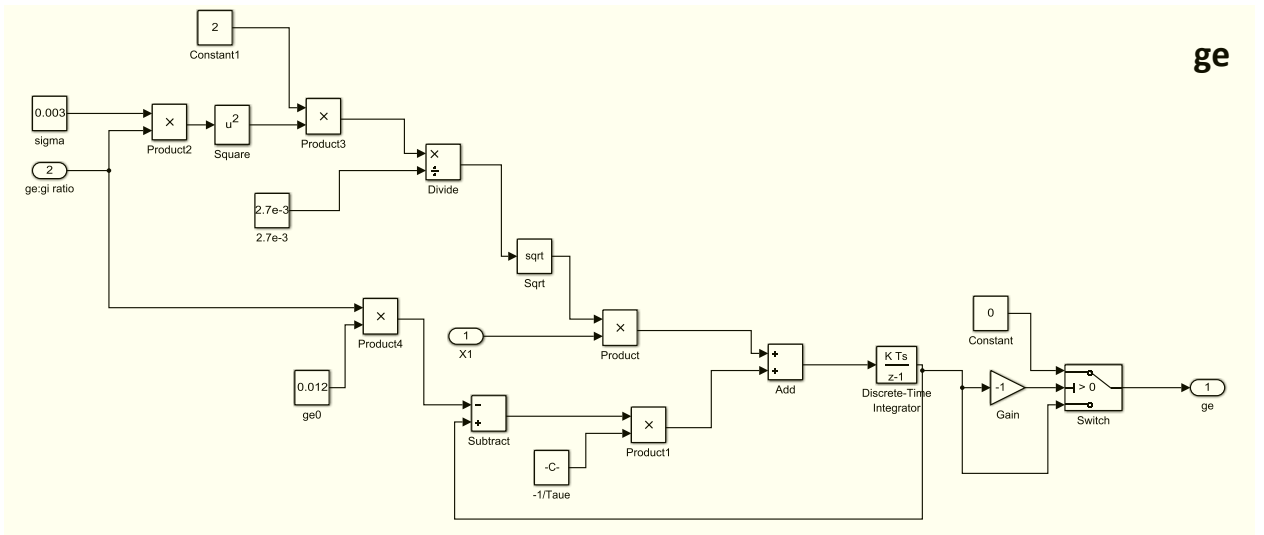

**Figure A1.3.1. Excitatory conductance (ge).**

$$\frac{dge}{dt} = -\frac{1}{taue} [ge - ge_0] + \sqrt{D_e} x_1$$

$$D_e = 2 * \frac{\sigma_{gae}^2}{taue}$$

where  $taue = 2.7 \text{ ms}$ ,  $ge_0 = 0.012 \mu\text{S}$ ,  $\sigma_{gae} = 0.003 \mu\text{S}$ ,  $D_e$  is the time constant, average standard deviation, and amplitude of the excitatory conductance, respectively, and  $x_1$  is Gaussian white noise of zero mean and unit standard deviation.

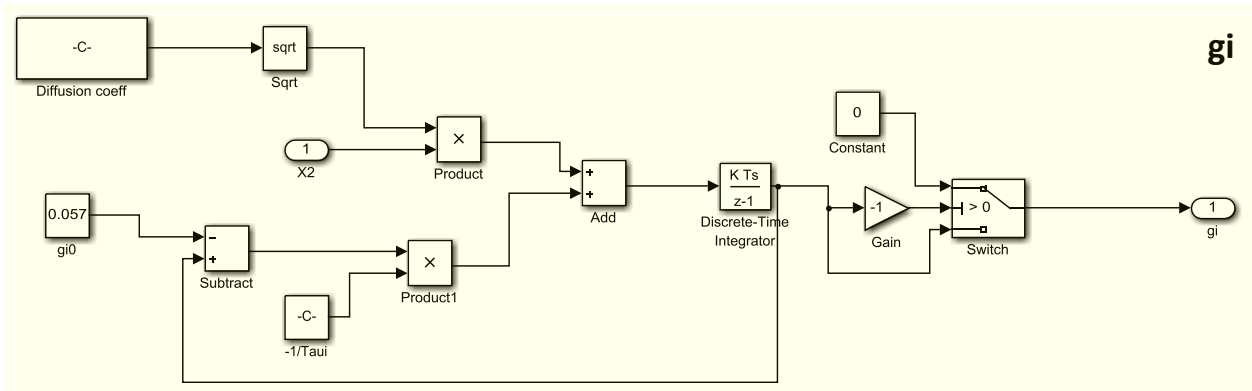

**Figure A1.3.2. Inhibitory conductance ( $g_i$ ).**

$$\frac{dg_i}{dt} = -\frac{1}{\tau_{aui}} [g_i - g_{i0}] + \sqrt{D_i} x_2$$

$$D_i = 2 * \frac{\sigma_{mai}^2}{\tau_{aui}}$$

where  $\tau_{aui} = 10.5 \text{ ms}$ ,  $g_{i0} = 0.057 \mu\text{S}$ ,  $\sigma_{mai} = 0.0066 \mu\text{S}$ ,  $D_i$  is the time constant, average standard deviation, and amplitude of the inhibitory conductance, respectively, and  $x_2$  is Gaussian white noise of zero mean and unit standard deviation.

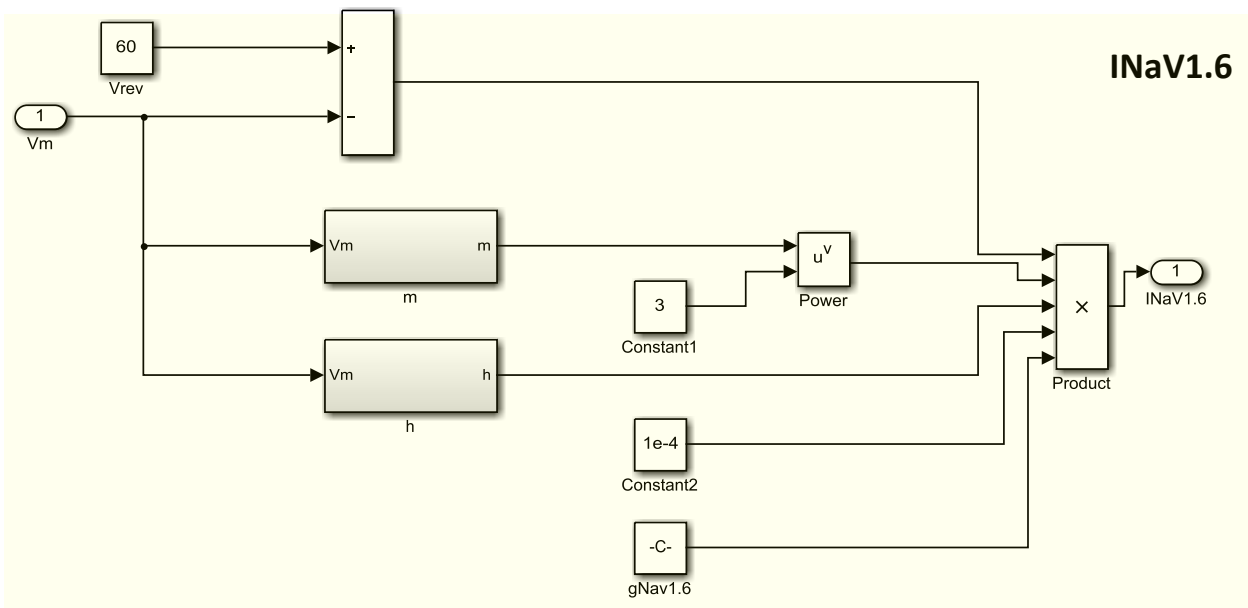

**Figure A1.4. Sodium ( $\text{Na}_{v1.6}$ ) current ( $\text{INaV1.6}$ ).vv**

$$\text{INaV1.6} = g_{\text{Nav1.6}} * m^3 h (V_m - (-60))$$

where  $g_{\text{Nav1.6}} = 1097.1 \text{ pS}\mu\text{m}^{-2}$  is the sodium conductance,  $m, h$  are activation and inactivation gates, respectively.

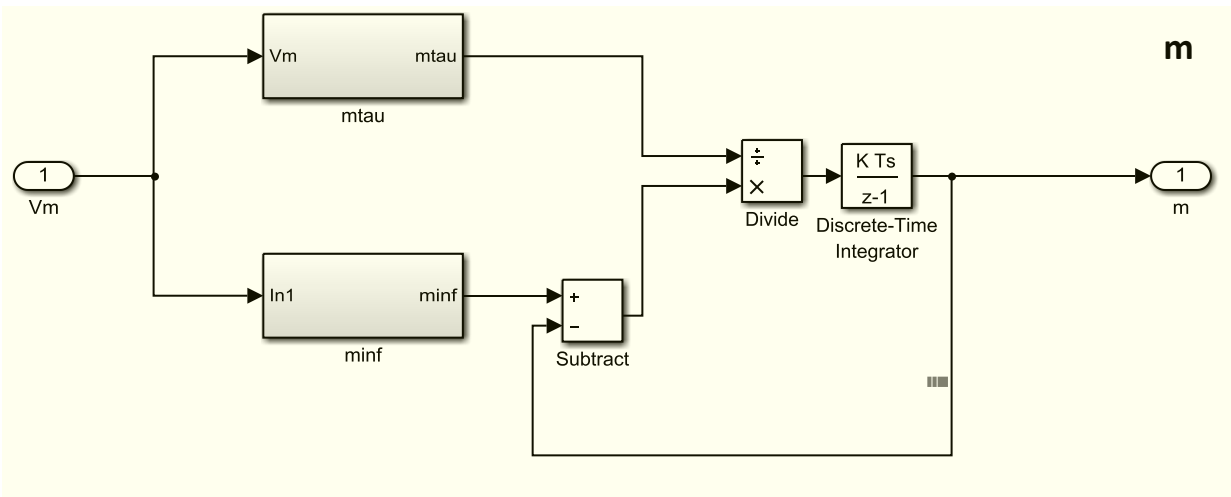

Figure A1.4.1. Sodium activation gate ( $m$ ).

$$\frac{dm}{dt} = \frac{m_{inf} - m}{m_{tau}}$$

where  $m_{inf}$ ,  $m_{tau}$  are the steady state activation and activation time constants, respectively.

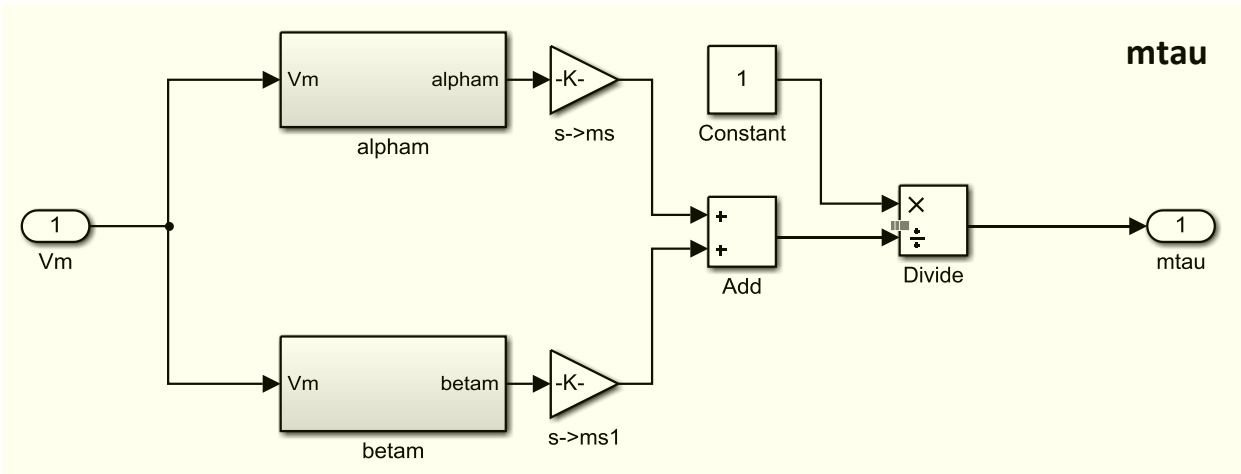

Figure A1.4.1.1. Activation time constant of sodium ion channel ( $mtau$ ).

$$mtau = \frac{1}{alphan + betam}$$

where  $alphan$  and  $betam$  are rate constants, respectively.



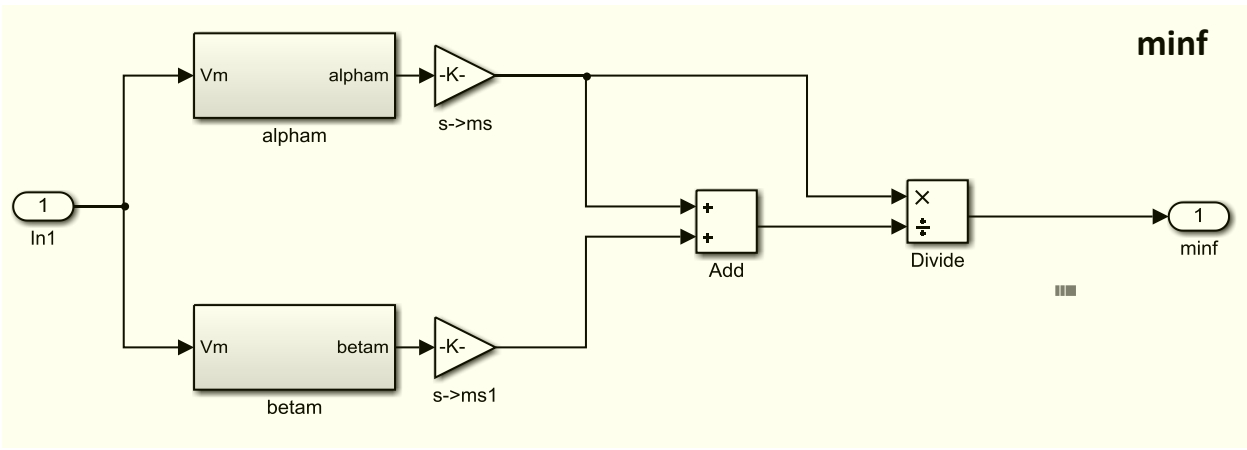

Figure A1.4.1.2. Steady-state activation of sodium ion channel (minf).

$$minf = \frac{alphan}{alphan + betam}$$

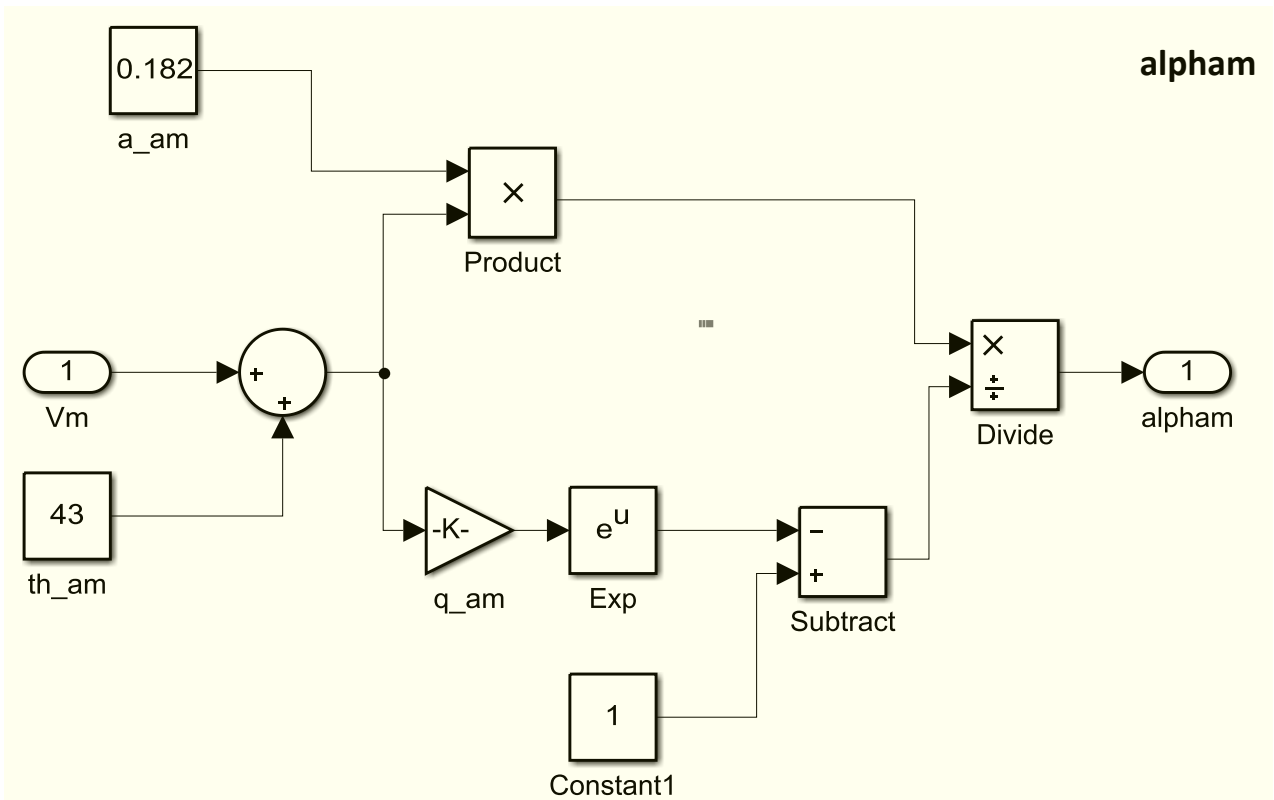

Figure A1.4.1.2.1. Rate constant (alphan).

$$alphan = \frac{0.182(Vm + 43)}{1 - \exp(-\frac{Vm + 43}{6})}$$

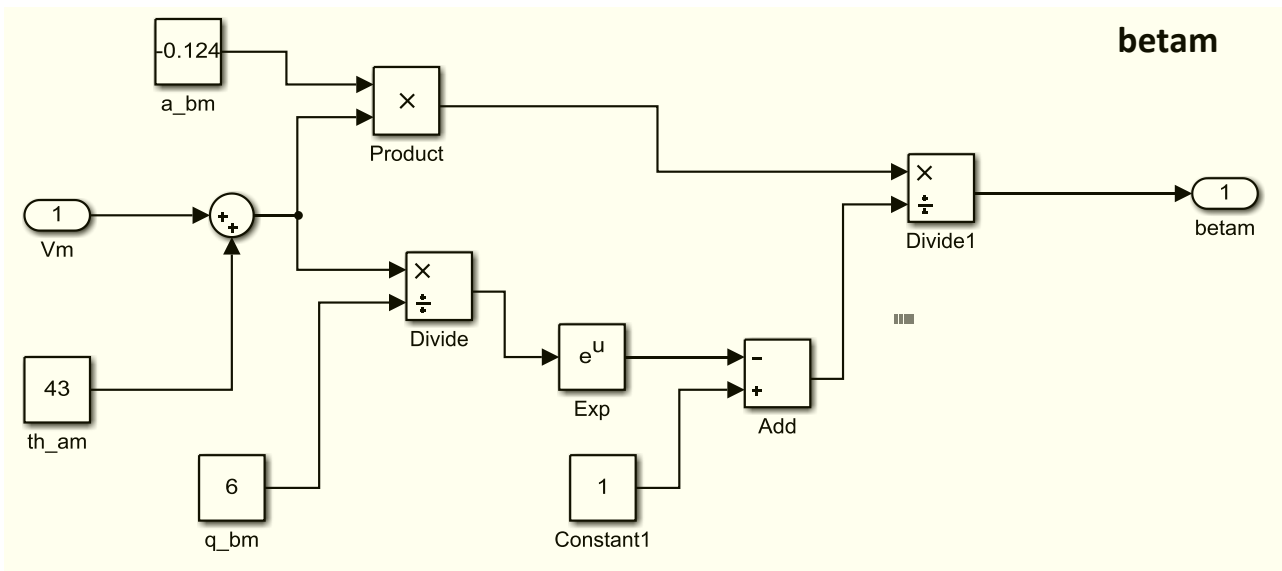

Figure A1.4.1.2.2. Rate constant (betam).

$$betam = \frac{-0.124(Vm + 43)}{1 - \exp\left(\frac{Vm + 43}{6}\right)}$$

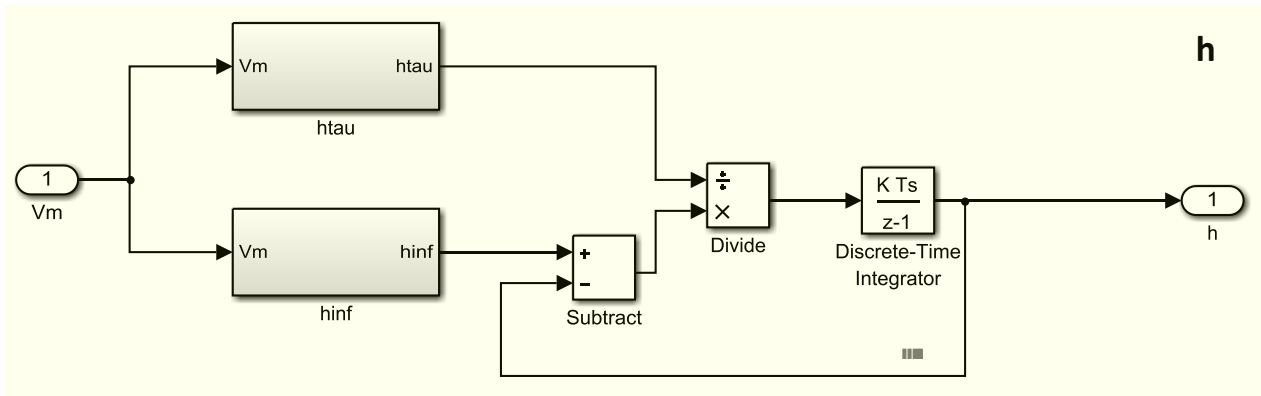

Figure A1.4.2. Sodium channel inactivation gate (h).

$$\frac{dh}{dt} = \frac{h_{inf} - h}{h_{tau}}$$

where  $h_{inf}$ ,  $h_{tau}$  are the steady state inactivation and inactivation time constants, respectively.

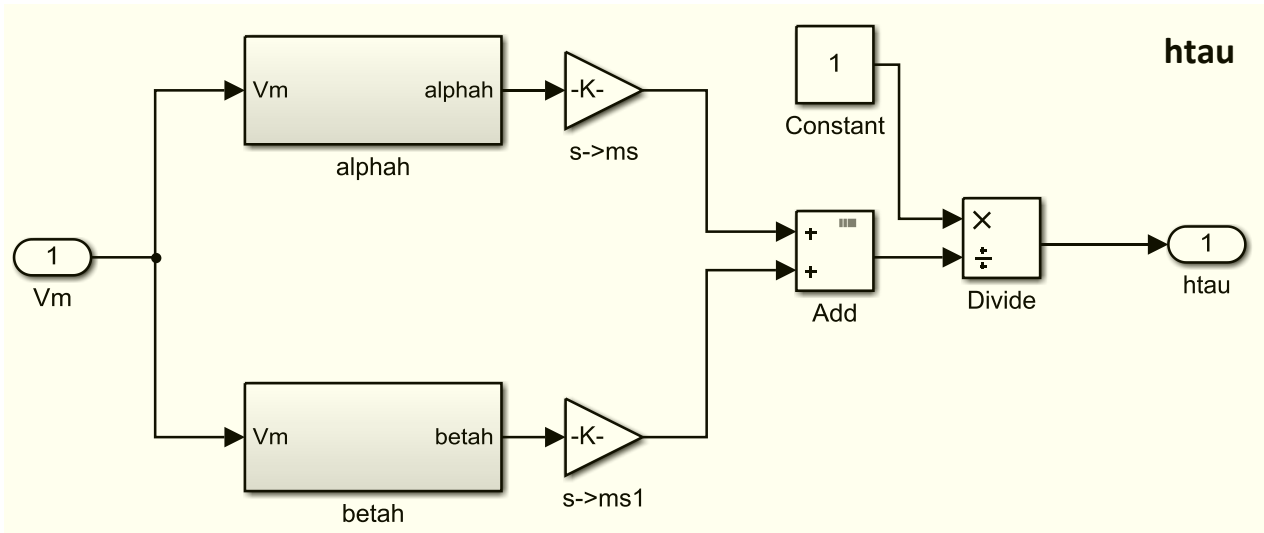

**Figure A1.4.2.1. Sodium channel inactivation time constant (htau).**

$$htau = \frac{1}{\text{alphah} + \text{betah}}$$

where *alphah* and *betah* are rate constants of inactivation, respectively.

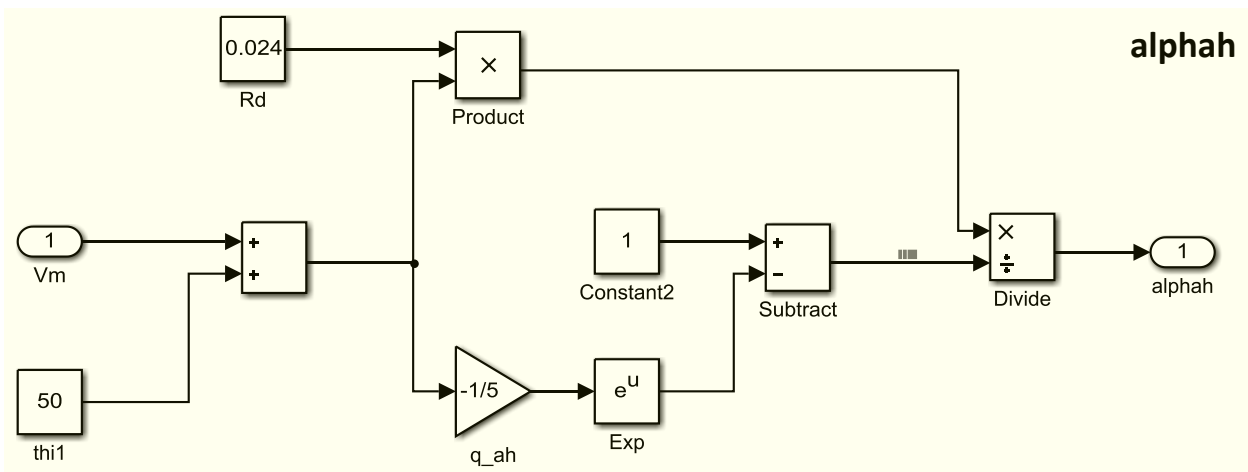

**Figure A1.4.2.1.1. Rate constant (alphah).**

$$\text{alphah} = \frac{0.024(Vm + 50)}{1 - \exp\left(-\frac{Vm + 50}{5}\right)}$$

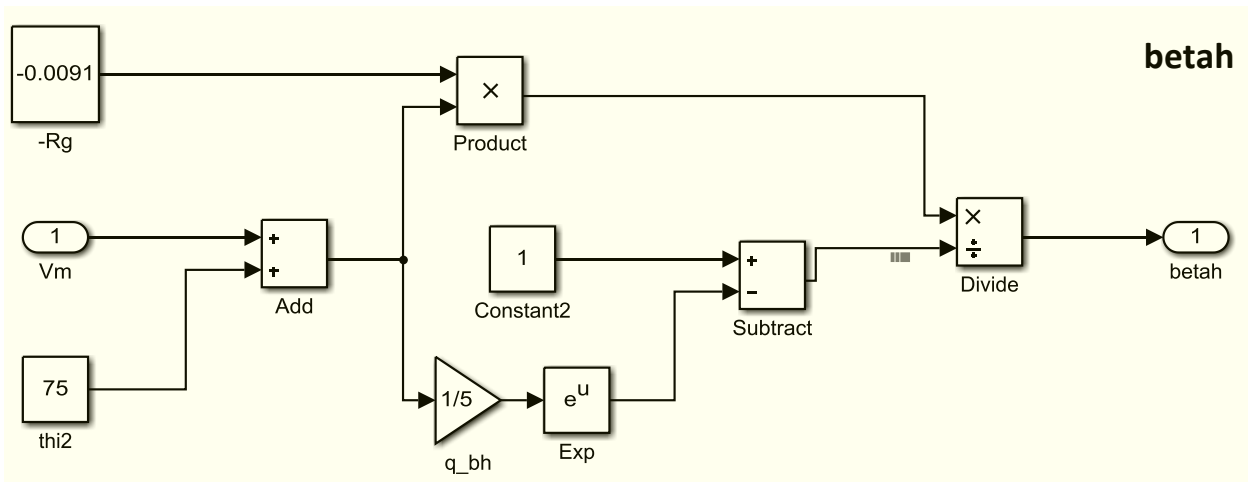

Figure A1.4.2.1.2. Rate constant (betah).

$$\beta = \frac{-0.0091(Vm + 75)}{1 - \exp\left(\frac{Vm + 75}{5}\right)}$$

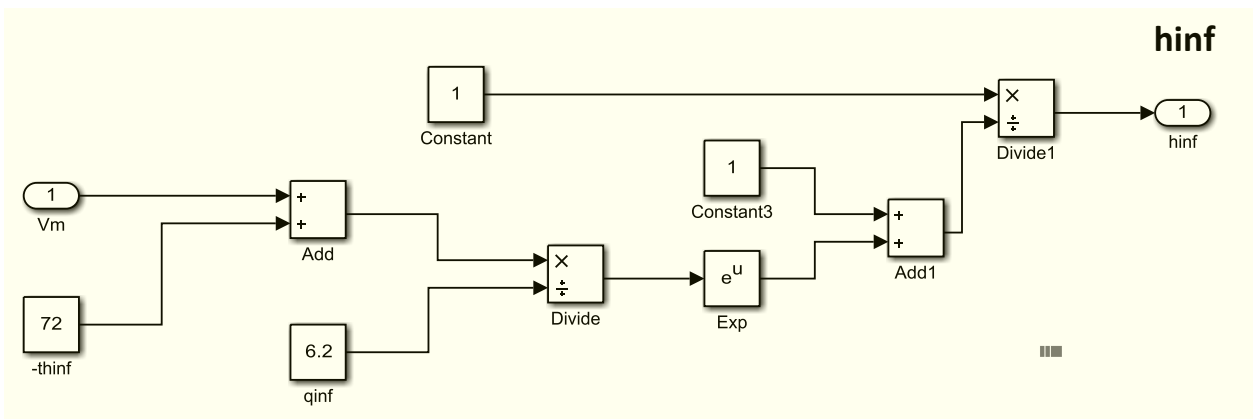

Figure A1.4.2.2. Sodium channel steady-state inactivation (hinf).

$$h_{inf} = \frac{1}{1 + \exp\left(\frac{Vm + 72}{6.2}\right)}$$

## References

1. Howell KB, *et al.* (2015) SCN2A encephalopathy: A major cause of epilepsy of infancy with migrating focal seizures. *Neurology* 85(11):958-966.
2. Nakamura K, *et al.* (2013) Clinical spectrum of SCN2A mutations expanding to Ohtahara syndrome. *Neurology* 81(11):992-998.
3. Epi KC, *et al.* (2013) *De novo* mutations in epileptic encephalopathies. *Nature* 501(7466):217-221.
4. Carvill GL, *et al.* (2013) Targeted resequencing in epileptic encephalopathies identifies *de novo* mutations in CHD2 and SYNGAP1. *Nature genetics* 45(7):825-830.
5. Samanta D & Ramakrishnaiah R (2015) *De novo* R853Q mutation of SCN2A gene and West syndrome. *Acta neurologica Belgica* 115(4):773-776.
6. Wolff M, *et al.* (2017) Genetic and phenotypic heterogeneity suggest therapeutic implications in SCN2A-related disorders. *Brain* 140(5):1316-1336.
7. Trump N, *et al.* (2016) Improving diagnosis and broadening the phenotypes in early-onset seizure and severe developmental delay disorders through gene panel analysis. *Journal of medical genetics* 53(5):310-317.
8. Kobayashi Y, *et al.* (2016) High prevalence of genetic alterations in early-onset epileptic encephalopathies associated with infantile movement disorders. *Brain Dev* 38(3):285-292.
9. Li J, *et al.* (2016) Genes with *de novo* mutations are shared by four neuropsychiatric disorders discovered from NPdenovo database. *Molecular psychiatry* 21(2):290-297.
10. Xu R, *et al.* (2007) A childhood epilepsy mutation reveals a role for developmentally regulated splicing of a sodium channel. *Mol Cell Neurosci* 35(2):292-301.
11. West JW, Scheuer T, Maechler L, & Catterall WA (1992) Efficient expression of rat brain type IIA Na<sup>+</sup> channel  $\alpha$  subunits in a somatic cell line. *Neuron* 8(1):59-70.
12. Cohen CJ, Bean BP, & Tsien RW (1984) Maximal upstroke velocity as an index of available sodium conductance. Comparison of maximal upstroke velocity and voltage clamp measurements of sodium current in rabbit Purkinje fibers. *Circ Res* 54(6):636-651.
13. Chadda KR, Jeevaratnam K, Lei M, & Huang CL (2017) Sodium channel biophysics, late sodium current and genetic arrhythmic syndromes. *Pflugers Arch* 469(5-6):629-641.
14. Jung HY, Mickus T, & Spruston N (1997) Prolonged sodium channel inactivation contributes to dendritic action potential attenuation in hippocampal pyramidal neurons. *J Neurosci* 17(17):6639-6646.
15. Vilin YY, Makita N, George AL, Jr., & Ruben PC (1999) Structural determinants of slow inactivation in human cardiac and skeletal muscle sodium channels. *Biophys J* 77(3):1384-1393.
16. Sokolov S, Scheuer T, & Catterall WA (2010) Ion permeation and block of the gating pore in the voltage sensor of Na<sub>v</sub>1.4 channels with hypokalemic periodic paralysis mutations. *J Gen Physiol* 136(2):225-236.
17. Hu W, *et al.* (2009) Distinct contributions of Na<sub>v</sub>1.6 and Na<sub>v</sub>1.2 in action potential initiation and backpropagation. *Nat Neurosci* 12(8):996-1002.
18. Mainen ZF & Sejnowski TJ (1996) Influence of dendritic structure on firing pattern in model neocortical neurons. *Nature* 382(6589):363-366.
19. Huguenard JR, Hamill OP, & Prince DA (1988) Developmental changes in Na<sup>+</sup> conductances in rat neocortical neurons: appearance of a slowly inactivating component. *Journal of neurophysiology* 59(3):778-795.
20. Hamill OP, Huguenard JR, & Prince DA (1991) Patch-clamp studies of voltage-gated currents in identified neurons of the rat cerebral cortex. *Cerebral cortex* 1(1):48-61.

21. Sah P & McLachlan EM (1992) Potassium currents contributing to action potential repolarization and the afterhyperpolarization in rat vagal motoneurons. *Journal of neurophysiology* 68(5):1834-1841.
22. Destexhe A, Rudolph M, Fellous JM, & Sejnowski TJ (2001) Fluctuating synaptic conductances recreate *in vivo*-like activity in neocortical neurons. *Neuroscience* 107(1):13-24.
23. Hodgkin AL & Huxley AF (1952) A quantitative description of membrane current and its application to conduction and excitation in nerve. *J Physiol* 117(4):500-544.
